# Supplementary material
Source: PubMed Central journal article supplement (PMC3902849)
Supplement: NIHMS391246-supplement-Supplementary_Files.pdf [file NIHMS391246-supplement-Supplementary_Files.pdf]

Supplementary Table S1: Fusion transcript predictions in KM-H2 and L428

| Gene 1 in the fusion pair | Gene 2 in the fusion pair | Chromosome 1 | Strand 1 | Chromosome 2 | Strand 2 | Number of paired end reads spanning the breakpoint | Number of reads split by the breakpoint | Breakpoint sequence                                                                                                                                                                                                                                                                                                                                              | Fusion adjacent genes | Inter-chromosomal | Genomic inversion | Genomic eversion |
|---------------------------|---------------------------|--------------|----------|--------------|----------|----------------------------------------------------|-----------------------------------------|------------------------------------------------------------------------------------------------------------------------------------------------------------------------------------------------------------------------------------------------------------------------------------------------------------------------------------------------------------------|-----------------------|-------------------|-------------------|------------------|
| <b>KM-H2</b>              |                           |              |          |              |          |                                                    |                                         |                                                                                                                                                                                                                                                                                                                                                                  |                       |                   |                   |                  |
| CIITA                     | FLJ27352                  | 16 +         |          | 15 +         |          | 13                                                 | 275                                     | GACCAAGTGACCTGGCTGGGAAGAAGAGATTGAGCTTCTCAAGACCCGACACAGACCACTCAAC<br>TGGCAGCAGTTGAGGAGCTGTTGTGACATGGAAAGTGTGAAGACAGGAGGGCTTATGCCAA<br>TATCGGGACTGGACCATGTCTCCAGGACTCCAGCTGGAGGGCTGGAGCAAGCATTTTCA<br>GATGAAAGACTTCTTCCATTCAATTCAGACACAGAAATGAAATGACAACTGGCTGTGTGGA<br>ACCCTGGAATCTGTGTTTATGATGATGGTGGATCAAAGACACTCCAGACGCCCACTCACTCAAA<br>ACCTCAAGTATGATTAAGAAC   | N                     | Y                 | N                 | N                |
| CIITA                     | FLJ27352                  | 16 +         |          | 15 +         |          | 417                                                | 273                                     | ATTGAGCTTCTCAAGACCCGACACACACCACTCAACTGCAGCAGTTGAGCAGGCTGTTGTGAGC<br>ATGGAGGTGATGAAGACAGCCAGGGAGGCTATGCGAATATGGAGCACTGGACAGTATGTTCCAG<br>GACTCCAGCTGGAGGGCTGAGGAGACATTTTCA(GATAAGAAAAGTCTCACTCAAAATCAAG<br>CACAGAAATGAAATGAACTGCCTCTGTGTGAGCCTGGCAATCTGTGTTTATGATGTTGTG<br>GATCAAGACACTCGACAGCGCACTCACTCAAAAGCTCAAGTTATGTATGA                                     | N                     | Y                 | N                 | N                |
| CIITA                     | FLJ27352                  | 16 +         |          | 15 +         |          | 35                                                 | 56                                      | ATTGAGCTTCTCAAGACCCGACACACACCACTCAACTGCAGCAGTTGAGCAGGCTGTTGTGAGC<br>ATGGAGGTGATGAAGACAGCCAGGGAGGCTATGCGAATATGGAGCACTGGACAGTATGTTCCAG<br>GACTCCAGCTGGAGGGCTGAGGAGACATTTTCA(GTATGTGATTTAAGGTAGTCTTCAAGCT<br>CAAGGAGGAGACCAACAGGCTTGTGTGA                                                                                                                           | N                     | Y                 | N                 | N                |
| BAT2L                     | MGMT                      | 9 +          |          | 10 +         |          | 55                                                 | 34                                      | TGAGCGGGAGACAGGGCCGGAGCTCACCGCCAGCAGCAGGAGCCGGAGGGAGGGAGGGA<br>GGAGGAGAGAGGAGGGCCGGCCGGCTGCAATCCCGCCTCCGCCAGCCGGAGGGAGGAGGGGA<br>CCGCCCCCGCTCCCTCCGCGCCGCGCCGCGCCGCGGCGCAGCAGTACTGAGGAAT<br>GGAAGAGT(TTGAAGTAAAGCCACACACTGGAGGCTT)TGGAAGCTTGGGAAGCTGAGCCTGTGTT<br>ATGAGAGGCTGAGCAATTAAGAGCTTGGAGAGGGAGGAGCTGCGACTGTGAGCTGTGAGGT<br>CCAGCCCGCTGCGGTTCTGGAGGTCGGAG | N                     | Y                 | N                 | N                |
| TP53BP1                   | HISPPD2A                  | 15 -         |          | 15 -         |          | 62                                                 | 29                                      | AAAAATGGCTAAGAGAGCTAAGCTCAGATGAGAGGCCCAGAGCTGGGAGAGCCCTCGCCC<br>ATCGCTCCAAAGCTTCTGTGAAGTCTAGTGGAGGTGATGATGATGATGATGATGATGATGATGAT<br>TTTAAATCTGGAGTGAAGTGGGAGAGCTGACTCTTATATATATGTTGGAGGAGGAGTATGA<br>TTATGAGCTTTTCCAAAGATCCAGGAGTGGGATGGAGTGGGAGGAGGAGGTAATGGGATTTG<br>GAGCTGGGGGCTGGACATGATGCTGCATAAATATAACTATGAGAAAT                                          | Y                     | N                 | N                 | Y                |
| DYNLT3                    | CYBB                      | X -          |          | X +          |          | 12                                                 | 15                                      | CATATAAATATGCAACTTGAATGAGCCCTATTCACTGACTACCTATACAAGTAGTAATTTGTCA<br>TTCTTTACTACCACTTCACTAATCACTTAAGAGCTTATTGTTGGGTCMAATTTAGGTGATBA<br>AGTATAGTAAAGTATA(GATCAAAAGT)CCAACTCTCACTAATGATTGAAAGCTGACCACTCT<br>AGGCCATCTTACTCAGGTTGATGCTCTTCCAAATAGCTGAGTGCCTCAGAACTCTCAAACTGAT<br>TTATATTCGCAAAAGAGAGAGAGAGAGCT                                                       | Y                     | N                 | Y                 | N                |
| AC008993.3                | VPS18                     | 19 -         |          | 15 +         |          | 18                                                 | 12                                      | CGGAGCTCCGGAGGGCCGCTCGAGGACCATGACTCTGTGAGGATGCAGCACTCCCTGGGAG<br>TGAGCTATGGCTCTTACTGAGCACTGATAGCAGACTGCGGAGAGGAGGCTGACAGGATGGGAG<br>ATGCCCTGAGTACTGAGAGGCTCTGAGACACTTCAAGCAGTCTGAGGAGGTGAGTATGAGAT<br>GGCAGCCGGCTGAGAGGCTCTGAGCACTTCCCTGCTGAGCAGTCTGAGCAGCACTGAGGAGG<br>AGCAGTGGAGCAGGCTCATCGCTATGAGTTTCTGGTGAAGCTGTGGGGAGGACTGAGGAGCC<br>ATCCAACTACCTGTGCA      | N                     | Y                 | N                 | N                |
| CIITA                     | FLJ27352                  | 16 +         |          | 15 +         |          | 8                                                  | 11                                      | TGGGGGTGGCTTAATGCTGAGCAGCATTTATGATGGGAGTCAAGCCCTCTCCCCAAGTGGGTA<br>CAAGAGACTACCTGGAGTTTTCATTGATGGTTGCTTGTGGTTTCTCAAGTGAAGGAC<br>ATAGACACAGATGATGAGTGGCTCAAAATGAGACTTTTATTTTATTTTGGCTTTCTATTAACATAT<br>CAACTCAAGCTGATCAAAATACTTAAATTTATATACGACTCTGGGATGGGCATTATTAATCA<br>TGGCTTTTCATTATCTTAAATATATATAT                                                            | N                     | Y                 | N                 | N                |
| PACS1                     | TSGA101P                  | 11 +         |          | 11 +         |          | 12                                                 | 11                                      | SACTTGGGGGAGGCTGCTCTGCTCTGCTTACTCTCACTCACTCATGGCTGAGTCGGTGGTGGGCT<br>GGCTCCCGCCCTCCGGGCGCGGGCCAGGGCCGACCCCGCCGGTGGAGATGAACTGTAC<br>GCCACTGGAGAGTGGAGGAGTCCAGCTGGTGGTGGTGGTGGTGGTGGTGGTGGTGGTGGTGGT<br>CTGAGTACCGGGAGGAGGAGGAGGAGGAGGAGGAGGAGGAGGAGGAGGAGGAGGAGGAGGAGG<br>GCTATGACGGCAATGGCCGCTCACCTCCTCGCTGAGTCTCCCGAGTCTGCGACAGCTGAGGGT<br>GATGAGGAGAGCT        | N                     | N                 | N                 | Y                |
| NFAT5                     | CYB5B                     | 16 +         |          | 16 +         |          | 36                                                 | 9                                       | CCCTCCGGCTGCCCTGGGGCCGGGCTGAGTGGTGGCTGGATGGCTGGACTCATCTCATCTGG<br>CCGAGCTAGACTGGATTGCCCAAGTCTCTACTGGGAGATCTCTGAGTATACCACTCAACA<br>GAATTTTCAAGAGCTGGACTGGAGAGGACTCTCAAAAGTGTATGAGTCAAAAGTTGGGGCAT<br>ATTGATTTTACCACTATAGGCGCTTCTCTAGTGTCTGCTGACCGCTACACTCGGAAAGCAA<br>TCTCTGGAGGGGCTGTGAAATGAGTGAAGTGTGCTCACTTCCTGGGGGAGAACTGAGAGCTGCT<br>GGGGCT                  | Y                     | N                 | N                 | Y                |
| CIITA                     | FLJ27352                  | 16 +         |          | 15 +         |          | 16                                                 | 8                                       | CTGTGAGCCCCAAGGAGCTCAAGTGTGCCCACATGAGGTTGGGGCCCTGAAAGTGGCAGCT<br>GGAGCTTTAACAGGAGTGTGACCCCCTGCTCTCACTCTATGAGGAGTGGAGTGGGAGTGGGCT<br>AGAGAGAGGAGTGAAGTCTACTGAG(GATGAAAGAAAGTCTTACCTTCAAACTCAAGACAGAAATGA<br>AATCTTCAKACTGCTCTGTGTTGTAAGCCAGCTGCTGTTTCAATGATGTTGATGAGCAGAGAG<br>ACTCAGAGCGACTCTACTCAAACTCAAAAT                                                     | N                     | Y                 | N                 | N                |
| IARS                      | ECM2                      | 9 -          |          | 9 -          |          | 12                                                 | 8                                       | AAGCATTTGAAATTTGCTGAAAGTGCAGCTGCAACATTTCCAGAAAGACACTGGGGACCC<br>CCATCCACTGGGTGAGGATGATTTGAGGAAATGGCTGGTGGGAAAATCAAACTGAAG<br>ATTGAGTGTGTTTTTTTTTTTTTTTCTGCTATCTTTCAACTGACTTGGAAAATGAGAAATCT<br>GGAGGCAGAGGAGGAGTACTGAGAGAGTGGAGAAAGTCTGAGAG                                                                                                                      | N                     | N                 | N                 | Y                |
| AC008993.3                | VPS18                     | 19 -         |          | 15 +         |          | 14                                                 | 7                                       | CGGGAGGGGGCTGGAGGACTGACTCTGTGAGGATGCAAGCTCCCTGGGAGTCAAGCACTTA<br>TGCCTGCCCCCTCAAGCAGCAGCTGGGGGAGAGAGGAGGAGGAGGAGGAGGAGGAGGAGGAGGAGG<br>ACTGCTGGAGAGTCTCGAGACACTTCAAGAGGAGTGGAGGAGGAGGAGGAGGAGGAGGAGGAGGAGG<br>AGCTGCTGAGGAGTGAAGTGGCAGAGAGCTGGCTGAAAGTCCAGCCGAGCTGTGGAG<br>GAGAGAAAGATGATACAGACAGCATGGCTGGCTGAGTGCCTGCTCAAGATTGAGGATGATG                         | N                     | Y                 | N                 | N                |
| MLL3                      | TPTE                      | 7 -          |          | 21 -         |          | 21                                                 | 6                                       | GGGAGTGAAGGAAACAGTGGTTCMAAAGAGAAAAGGAACCATACAGACAGGATTTGGTGGAT<br>TATGGTGGCAAGAAAGTGGAGGAGGAGGAGGAGGAGGAGGAGGAGGAGGAGGAGGAGGAGGAGGAG<br>CAGGCTTCTTTTTCAGAGTACTTCAAGAGATGATGAGATTTTACCGCTGCTCTTGGAGCTTCTG<br>GACTTGTGATTTACTAGAGCTGAACACCAGGCTCTTCTGCCCCAGTGGCTTGAAGCAGTCT<br>TGGTGTATAGAGTATGATCACTACAGACTACTGACTGTCTTCTTGAACAACTAGACCAATGGTCC<br>A              | N                     | Y                 | N                 | N                |
| <b>L428</b>               |                           |              |          |              |          |                                                    |                                         |                                                                                                                                                                                                                                                                                                                                                                  |                       |                   |                   |                  |
| TNRC18B                   | MYLPF                     | 7 -          |          | 16 +         |          | 20                                                 | 21                                      | TCCAGTGCATCCAGGCGGGAGTCCGCGGGCCGAGCGAGCTGGAGCGAGGGGCTCT<br>GGAGGCGCCCGGCTCCCGGGCTTGGAGCGGGAGGAGGCTGGCGAGAGAACTGGTCT<br>ATCCGCTCAAGCGGGCCGCCCCGGATGCCCCAGCGTGGGCGCACCGGCTCCGCCC<br>AGCAGTGTGCTCCACTGACTCTGCTGGCCTGGTGAAGCTCCTCACTACTAGAGAG<br>GGCTGGTGGCTCAACTGCTTGGGCTCTTGAAGCTGTGTATGATGATTTCTGATCACTGTCT<br>TCTATTAGTATAGGCAAGTTCTGGGAGTGGGACTAGACT            | N                     | Y                 | N                 | N                |
| ELMO1                     | SLCO3A1                   | 7 -          |          | 15 +         |          | 8                                                  | 6                                       | GGTATAGACAGTGTGGCTTAACTGCTAGGATCTTAACTCCACTGGTGGAACTTTGGGAGGACT<br>TAAATGCCCCAGGCGATCTGCAAGTGGCCATGAAAGTGGCGGGCCCTACCCAACTCAT<br>GGAAATGATGAGGCTAGATGAAAGATGTTCTGTTTACCGCTGCTCTTGGAGCTGCTGTG<br>GAGGAGTGTGATCAACTGTTGTTGAGGAGCACTTGAAGGCTTGGAGAGGAGGAGGAGGAGGAGGAG<br>AGCTTCTGCCAAGCAGC                                                                          | N                     | Y                 | N                 | N                |
| ELMO1                     | SLCO3A1                   | 7 -          |          | 15 +         |          | 17                                                 | 5                                       | CTTCTGTCATTCCTCATAGGATAGACAGTGTGGGCTTTACGCTGAGGACTCATCCAGCTG<br>GCTTGAAATTTGGGAGTACTAGTGGCTGGCAGCAGTCTGGAGGAGTCTGAGGCTGATGAGTGGG<br>GGCCCTACCAGTACTGGAAATTGAT(CAGACTATTGAATGACTCTGTGAGACACAAGAA<br>ATGAGGAGGAGGACTAGTGGGACTCTGGGAGCTTTTGTACTGATGTTGAAAGCTGTGGT<br>AGTCTTCTGTTCTGGGAGCACTCAAGGCTATTATTTCAAAATAAATGAAATGATGATCA<br>G                               | N                     | Y                 | N                 | N                |
| ELMO1                     | SLCO3A1                   | 7 -          |          | 15 +         |          | 15                                                 | 5                                       | CAGCTGGCCGTTACCTGTTAGGATCTCATCCCAGTGGTGGAACTTTGGGAGCTTAAATG<br>GCGACCGCGACAGTCTCAAGTGGCAGTAGATGCGCGGCTTCCACCAACTTTGGAAAT<br>GATCAGAACTCTGTTCAAGATCTGTTATGGACAGCTGGGGTATCTGGGCTCTTCTGTA<br>CAAAATGACTGGTATGCTGCTGATGATGAGCAAACTGGAGACTCCTGGAGCAGCCCGGCT<br>GGAT                                                                                                   | N                     | Y                 | N                 | N                |
| ELMO1                     | SLCO3A1                   | 7 -          |          | 15 +         |          | 15                                                 | 5                                       | ATTGACATGGGAGGAGGTTAGAGGAGGTTGATGATCTCTTCCGACCCCTCTTTTTCGCC<br>CTGAAAGCTCTGTTGGAGAGTCTCTTGTGAAACACTGAGTGGAGAGCTGAGGCTTTGGT<br>TCTCTCTTCTGCTCACTTCTTGGTGTGATGACTCACTTCTTTGGTGTGATGAAAGGAG<br>AGGAAATGAGTGGTGTAACTTCTTCTTTTTTCTCTTCTTACTGATGCTTGGACCTTCA                                                                                                           | N                     | Y                 | N                 | N                |

**Supplementary Table S2: Differentially expressed genes between KMH2 CIITA-FLJ27352 knockdown cultures and non-silencing controls**

NS-1: non-silencing control, baseline replicate 1; NS-2: non-silencing control, baseline replicate 2; H5-1: fusion gene knockdown, experiment replicate 1 (clone H5); H5-2, fusion gene knockdown, experiment replicate 2 (clone 5). Fold change (FC): negative values indicate lower expression in knockdown cells, positive values higher expression knockdown cells.

| Probe set    | Gene                                                                                                                                                                                                                              | Accession | EntrezGene                                            | NS-1    | NS-2    | Baseline mean | H5-1   | H5-2   | Experiment mean | Fold change | Lower bound of FC |
|--------------|-----------------------------------------------------------------------------------------------------------------------------------------------------------------------------------------------------------------------------------|-----------|-------------------------------------------------------|---------|---------|---------------|--------|--------|-----------------|-------------|-------------------|
| 1558407_at   | CDNA FLJ38638 fis, clone HHDPC2003381                                                                                                                                                                                             | AK095957  |                                                       | 139.7   | 131.03  | 135.65        | 33.87  | 30.31  | 32.02           | -4.24       | -3.14             |
| 230093_at    | testis specific A2 homolog (mouse)                                                                                                                                                                                                | AI683428  | 89765                                                 | 125.96  | 134.11  | 129.6         | 58.98  | 60.8   | 59.8            | -2.17       | -1.88             |
| 204430_s_at  | solute carrier family 2 (facilitated glucose/fructose transporter), member 5                                                                                                                                                      | NM_003039 | 6518                                                  | 51.94   | 50.29   | 51.12         | 25.86  | 26.18  | 26.08           | -1.96       | -1.68             |
| 1569372_at   | Tubulin, beta 2B                                                                                                                                                                                                                  | AV723391  | 347733                                                | 53.88   | 53.49   | 53.63         | 26.53  | 28.15  | 27.6            | -1.94       | -1.67             |
| 210182_at    | cortistatin                                                                                                                                                                                                                       | AB000263  | 1325                                                  | 53.71   | 57.29   | 55.34         | 31.44  | 22.5   | 26.94           | -2.05       | -1.52             |
| 214135_at    | claudin 18                                                                                                                                                                                                                        | BE551219  | 51208                                                 | 50.94   | 47      | 48.76         | 26.92  | 24.28  | 25.76           | -1.89       | -1.47             |
| 215450_at    | gb:W87901/DB_XREF=gi:1401985/DB_XREF=zH66f04.r1/CLONE=IMAGE:417055/FEA=mRNA/CNT=4/TID=Hs.1066.2/TIER=ConsEnd/STK=0/UG=Hs.1066/LL=6635/UG_GENE=SNRPE/UG_TITLE=small nuclear ribonucleoprotein polypeptide E                        | W87901    |                                                       | 207.66  | 227.58  | 218.38        | 139.04 | 128.19 | 133.63          | -1.63       | -1.43             |
| 222201_s_at  | CASP8 associated protein 2                                                                                                                                                                                                        | AB037736  | 9994                                                  | 56.64   | 57.7    | 57.28         | 33.18  | 28.98  | 31.08           | -1.84       | -1.42             |
| 214677_x_at  | coagulation factor XIII, B polypeptide /// immunoglobulin lambda locus /// immunoglobulin lambda variable 4-3 /// immunoglobulin lambda variable 3-25 /// immunoglobulin lambda variable 2-14 /// immunoglobulin lambda joining 3 | X57812    | 2165 /// 28786 /// 28793 /// 28815 /// 28831 /// 3535 | 94.11   | 100.6   | 96.86         | 52.62  | 61.89  | 56.47           | -1.72       | -1.39             |
| 212261_at    | trinucleotide repeat containing 15                                                                                                                                                                                                | AB014542  | 26058                                                 | 93.26   | 88.34   | 90.94         | 59.07  | 47.78  | 53.78           | -1.69       | -1.38             |
| 78047_s_at   | Cluster Incl. AW001777:ws04f09.x1 Homo sapiens cDNA, 3 end /clone=IMAGE-2496233 /clone_end=3 /gb=AW001777 /gi=5848693 /ug=Hs.233641 /len=485                                                                                      | AW001777  |                                                       | 176.79  | 168.26  | 172.51        | 119.76 | 119.38 | 119.61          | -1.44       | -1.36             |
| 239084_at    | Transcribed locus                                                                                                                                                                                                                 | BE896490  |                                                       | 59.91   | 66.56   | 63.26         | 35.58  | 35.81  | 35.69           | -1.77       | -1.35             |
| 1552912_a_at | interleukin 23 receptor                                                                                                                                                                                                           | NM_144701 | 149233                                                | 51.64   | 55.86   | 54.05         | 27.2   | 35.58  | 31.56           | -1.71       | -1.35             |
| 224851_at    | cyclin-dependent kinase 6                                                                                                                                                                                                         | AW274756  | 1021                                                  | 178.61  | 153.32  | 165.89        | 100.31 | 109.21 | 104.83          | -1.58       | -1.35             |
| 202403_s_at  | collagen, type I, alpha 2                                                                                                                                                                                                         | AA788711  | 1278                                                  | 56.38   | 53.28   | 54.68         | 37.27  | 32.9   | 35.14           | -1.56       | -1.35             |
| 243309_at    | hypothetical LOC145788                                                                                                                                                                                                            | AA398658  | 145788                                                | 879.78  | 947.45  | 914.53        | 620.59 | 590.34 | 605.96          | -1.51       | -1.35             |
| 223839_s_at  | PRO1933                                                                                                                                                                                                                           | AF132203  |                                                       | 172.71  | 151.81  | 162.92        | 95.43  | 103.98 | 98.97           | -1.65       | -1.34             |
| 203685_at    | B-cell CLL/lymphoma 2                                                                                                                                                                                                             | NM_000633 | 596                                                   | 122.4   | 148.7   | 135.97        | 81.1   | 85.9   | 83.49           | -1.63       | -1.34             |
| 226959_at    | gb:AL137430.1/DB_XREF=gi:6807987/FEA=mRNA/CNT=36/TID=Hs.8087.2/TIER=Stack/STK=16/UG=Hs.8087/LL=51754/UG_GENE=LOC51754/UG_TITLE=NAG-5 protein/DEF=Homo sapiens mRNA; cDNA DKFZp761D1624                                            | AL137430  |                                                       | 97.41   | 97.5    | 97.45         | 64.61  | 52.57  | 58.74           | -1.66       | -1.33             |
| 201626_at    | insulin induced gene 1                                                                                                                                                                                                            | BG292233  | 3638                                                  | 958.63  | 835.33  | 898.32        | 597.01 | 580.89 | 589.06          | -1.53       | -1.33             |
| 203592_s_at  | folliculin-like 3 (secreted glycoprotein)                                                                                                                                                                                         | NM_005860 | 10272                                                 | 102.11  | 170.94  | 136.29        | 62.61  | 58.03  | 60.12           | -2.27       | -1.31             |
| 31837_at     | transmembrane protein 153                                                                                                                                                                                                         | U62317    | 91289                                                 | 64.98   | 61.66   | 63.71         | 42.19  | 30.08  | 36.34           | -1.75       | -1.31             |
| 201951_at    | activated leukocyte cell adhesion molecule                                                                                                                                                                                        | BF242905  | 214                                                   | 238.11  | 224.71  | 231.28        | 166.2  | 149.72 | 158.1           | -1.46       | -1.31             |
| 207963_at    | chromosome 6 open reading frame 54                                                                                                                                                                                                | NM_014354 | 26236                                                 | 43.24   | 50.26   | 46.36         | 29.03  | 13.81  | 21.32           | -2.17       | -1.3              |
| 234675_x_at  | CDNA: FLJ23566 fis, clone LNG10880                                                                                                                                                                                                | AK027219  |                                                       | 90.28   | 88.6    | 89.54         | 62.17  | 52.68  | 57.28           | -1.56       | -1.3              |
| 228468_at    | microtubule associated serine/threonine kinase-like                                                                                                                                                                               | BF108964  | 84930                                                 | 82.02   | 85.22   | 83.41         | 55.64  | 58.26  | 56.65           | -1.47       | -1.3              |
| 228171_s_at  | pleckstrin homology domain containing, family G (with RhoGef domain) member 4                                                                                                                                                     | AI056683  | 25894                                                 | 85.16   | 87.25   | 86.18         | 62.41  | 58.91  | 60.64           | -1.42       | -1.29             |
| 203020_at    | RAB GTPase activating protein 1-like                                                                                                                                                                                              | NM_014857 | 9910                                                  | 56.68   | 51.73   | 53.79         | 34.89  | 30.36  | 32.53           | -1.65       | -1.28             |
| 205089_at    | zinc finger protein 7                                                                                                                                                                                                             | NM_003416 | 7553                                                  | 88.73   | 81.57   | 84.82         | 56.57  | 55.95  | 56.22           | -1.51       | -1.28             |
| 201296_s_at  | WD repeat and SOCS box-containing 1                                                                                                                                                                                               | NM_015626 | 26118                                                 | 336.23  | 328.19  | 332.87        | 248.65 | 220.39 | 234.51          | -1.42       | -1.28             |
| 202048_s_at  | chromobox homolog 6                                                                                                                                                                                                               | NM_014292 | 23466                                                 | 212.98  | 216.81  | 214.73        | 154.68 | 156.21 | 155.56          | -1.38       | -1.28             |
| 217814_at    | coiled-coil domain containing 47                                                                                                                                                                                                  | NM_020198 | 57003                                                 | 270.49  | 271.1   | 270.76        | 198.12 | 192.21 | 195.58          | -1.38       | -1.28             |
| 1556385_at   | Cardiotrophin-like cytokine factor 1                                                                                                                                                                                              | BQ028191  | 23529                                                 | 80.13   | 60.76   | 70.37         | 44.76  | 36.02  | 40.34           | -1.74       | -1.27             |
| 212500_at    | chromosome 10 open reading frame 22                                                                                                                                                                                               | AL049319  | 84890                                                 | 78.17   | 84.87   | 80.68         | 50.11  | 56.23  | 52.77           | -1.53       | -1.27             |
| 215716_s_at  | ATPase, Ca++ transporting, plasma membrane 1                                                                                                                                                                                      | L14561    | 490                                                   | 96.9    | 91.94   | 94.59         | 67.28  | 56.96  | 62.25           | -1.52       | -1.27             |
| 231992_x_at  | RAB guanine nucleotide exchange factor (GEF) 1 pseudogene                                                                                                                                                                         | AK024371  | 493754                                                | 72.13   | 67.25   | 69.7          | 42.62  | 49.43  | 46.14           | -1.51       | -1.27             |
| 208072_s_at  | diacylglycerol kinase, delta 130kDa                                                                                                                                                                                               | NM_003648 | 8527                                                  | 91      | 86.69   | 88.6          | 62.14  | 57.95  | 59.87           | -1.48       | -1.27             |
| 218381_s_at  | U2 small nuclear RNA auxiliary factor 2                                                                                                                                                                                           | NM_007279 | 11338                                                 | 296.35  | 274.84  | 285.86        | 205.6  | 210.21 | 208.13          | -1.37       | -1.27             |
| 217678_at    | solute carrier family 7, (cationic amino acid transporter, y+ system) member 11                                                                                                                                                   | AA488687  | 23657                                                 | 44.06   | 63.24   | 53.52         | 26.91  | 30.65  | 28.47           | -1.88       | -1.26             |
| 241380_at    | FLJ11603 protein                                                                                                                                                                                                                  | BF508325  | 389337                                                | 52.42   | 41.75   | 47.14         | 28.19  | 30.41  | 29.01           | -1.63       | -1.26             |
| 1569522_at   | SLG7A5 pseudogene                                                                                                                                                                                                                 | BC015443  | 81893                                                 | 100.94  | 91.27   | 96.24         | 68.24  | 50.96  | 59.69           | -1.61       | -1.26             |
| 214149_s_at  | ATPase, H+ transporting, lysosomal 9kDa, V0 subunit e                                                                                                                                                                             | AI252582  | 8992                                                  | 92.85   | 100.65  | 97.25         | 68.84  | 63.02  | 65.88           | -1.48       | -1.26             |
| 219805_at    | chromosome X open reading frame 56                                                                                                                                                                                                | NM_022101 | 63932                                                 | 47.14   | 47.23   | 47.19         | 34.22  | 29.7   | 32.11           | -1.47       | -1.26             |
| 224847_at    | cyclin-dependent kinase 6                                                                                                                                                                                                         | AW051349  | 1021                                                  | 115.92  | 112.74  | 114.31        | 81.63  | 82.1   | 81.81           | -1.4        | -1.26             |
| 227728_at    | CDNA FLJ42306 fis, clone TRACH2001646                                                                                                                                                                                             | AA886888  |                                                       | 134.77  | 133.79  | 134.32        | 95.41  | 101.41 | 98.14           | -1.37       | -1.26             |
| 200832_s_at  | stearoyl-CoA desaturase (delta-9-desaturase)                                                                                                                                                                                      | AB032261  | 6319                                                  | 1048.81 | 1085.85 | 1067.28       | 814.68 | 814.75 | 814.73          | -1.31       | -1.26             |
| 215623_x_at  | structural maintenance of chromosomes 4                                                                                                                                                                                           | AK002200  | 10051                                                 | 98.42   | 69.52   | 84.1          | 49.34  | 42.83  | 46.46           | -1.81       | -1.25             |
| 213275_x_at  | cathepsin B                                                                                                                                                                                                                       | W47179    | 1508                                                  | 70.02   | 57.73   | 63.46         | 39.93  | 41.42  | 40.61           | -1.56       | -1.25             |
| 224791_at    | development and differentiation enhancing factor 1                                                                                                                                                                                | AW513835  | 50807                                                 | 105.27  | 100.42  | 103.25        | 73.08  | 74.83  | 74.1            | -1.39       | -1.25             |
| 205890_s_at  | ubiquitin D                                                                                                                                                                                                                       | NM_006398 | 10537                                                 | 231.7   | 231.51  | 231.63        | 173.47 | 176.07 | 174.78          | -1.33       | -1.25             |
| 206147_x_at  | sex comb on midleg-like 2 (Drosophila)                                                                                                                                                                                            | NM_006089 | 10389                                                 | 54.63   | 65.44   | 60            | 41.9   | 30.46  | 36.1            | -1.66       | -1.24             |
| 201887_at    | interleukin 13 receptor, alpha 1                                                                                                                                                                                                  | NM_001560 | 3597                                                  | 146.12  | 171.33  | 158.78        | 106.63 | 107.18 | 106.86          | -1.49       | -1.24             |
| 226254_s_at  | KIAA1430                                                                                                                                                                                                                          | AI912523  | 57587                                                 | 274.08  | 296.35  | 285.95        | 204.37 | 199.07 | 202.05          | -1.42       | -1.24             |
| 212373_at    | fem-1 homolog b (C. elegans)                                                                                                                                                                                                      | AW139179  | 10116                                                 | 81.47   | 85.41   | 83.49         | 56.97  | 61.67  | 59.18           | -1.41       | -1.24             |
| 211452_x_at  | leucine rich repeat (in FLII) interacting protein 1                                                                                                                                                                               | AF130054  | 9208                                                  | 152.1   | 148.19  | 150.23        | 107.96 | 112.5  | 110.04          | -1.37       | -1.24             |
| 229419_at    | F-box and WD-40 domain protein 7 (archipelago homolog, Drosophila)                                                                                                                                                                | BF222826  | 55294                                                 | 178.45  | 171.3   | 174.74        | 131.99 | 125.93 | 129.11          | -1.35       | -1.24             |
| 212930_at    | ATPase, Ca++ transporting, plasma membrane 1                                                                                                                                                                                      | AW576457  | 490                                                   | 33.25   | 33.29   | 33.27         | 22.64  | 20.35  | 21.46           | -1.55       | -1.23             |



|              |                                                                                                                                             |           |                            |        |        |        |         |         |         |      |      |
|--------------|---------------------------------------------------------------------------------------------------------------------------------------------|-----------|----------------------------|--------|--------|--------|---------|---------|---------|------|------|
| 1555193_a_at | zinc finger protein 277                                                                                                                     | BC020626  | 11179                      | 36.01  | 38.62  | 37.34  | 51.47   | 55.39   | 53.34   | 1.43 | 1.21 |
| 201233_at    | proteasome (prosome, macropain) 26S subunit, non-ATPase, 13                                                                                 | NM_002817 | 5719                       | 62.86  | 56.07  | 59.81  | 85.58   | 86.18   | 85.82   | 1.44 | 1.21 |
| 204610_s_at  | coiled-coil domain containing 85B                                                                                                           | NM_006848 | 11007                      | 82     | 72.97  | 78.06  | 106.64  | 120.62  | 113.98  | 1.46 | 1.21 |
| 206919_at    | ELK4, ETS-domain protein (SRF accessory protein 1)                                                                                          | NM_021795 | 2005                       | 36.93  | 33.36  | 35.14  | 49.03   | 54.31   | 51.57   | 1.47 | 1.21 |
| 32032_at     | DiGeorge syndrome critical region gene 14                                                                                                   | L77566    | 8220                       | 43.5   | 38.27  | 40.47  | 57.72   | 61.56   | 59.91   | 1.48 | 1.21 |
| 227864_s_at  | family with sequence similarity 125, member A                                                                                               | AI091713  | 93343                      | 70.17  | 61.72  | 65.79  | 104.51  | 90.54   | 97.49   | 1.48 | 1.21 |
| 204044_at    | quinolinate phosphoribosyltransferase (nicotinate-nucleotide pyrophosphorylase (carboxylating))                                             | NM_014298 | 23475                      | 24.33  | 25.13  | 24.73  | 37.89   | 36.05   | 36.92   | 1.49 | 1.21 |
| 201940_at    | carboxypeptidase D                                                                                                                          | AA897514  | 1362                       | 43.7   | 50.65  | 47.95  | 66.42   | 78.59   | 72.68   | 1.52 | 1.21 |
| 211530_x_at  | HLA-G histocompatibility antigen, class I, G                                                                                                | M90686    | 3135                       | 36.94  | 53.98  | 45.35  | 72.79   | 73.44   | 73.05   | 1.61 | 1.21 |
| 208447_s_at  | phosphoribosyl pyrophosphate synthetase 1                                                                                                   | NM_002764 | 5631                       | 66.16  | 46.77  | 56.28  | 98.14   | 86.46   | 92.23   | 1.64 | 1.21 |
| 210664_s_at  | tissue factor pathway inhibitor (lipoprotein-associated coagulation inhibitor)                                                              | AF021834  | 7035                       | 27.45  | 40.87  | 34.28  | 56.29   | 58.93   | 57.63   | 1.68 | 1.21 |
| 215193_x_at  | major histocompatibility complex, class II, DR beta 1                                                                                       | AJ297586  | 3123                       | 701.38 | 700    | 700.78 | 914.14  | 911.65  | 912.89  | 1.3  | 1.22 |
| 223040_at    | N-acetyltransferase 5                                                                                                                       | BC005181  | 51126                      | 168.93 | 165.83 | 167.43 | 216.65  | 222.61  | 219.24  | 1.31 | 1.22 |
| 200975_at    | palmitoyl-protein thioesterase 1 (ceroid-lipofuscinosis, neuronal 1, infantile)                                                             | NM_000310 | 5538                       | 449.51 | 421.99 | 435.65 | 585.54  | 564.65  | 573.81  | 1.32 | 1.22 |
| 225161_at    | G elongation factor, mitochondrial 1                                                                                                        | AI659020  | 85476                      | 167.47 | 160.28 | 163.88 | 219.61  | 211.15  | 215.62  | 1.32 | 1.22 |
| 203650_at    | protein C receptor, endothelial (EPCR)                                                                                                      | NM_006404 | 10544                      | 44.84  | 45.29  | 45.05  | 59.53   | 60.59   | 60      | 1.33 | 1.22 |
| 200746_s_at  | guanine nucleotide binding protein (G protein), beta polypeptide 1                                                                          | NM_002074 | 2782                       | 350.35 | 324.98 | 340.82 | 467.2   | 454.62  | 460.63  | 1.35 | 1.22 |
| 217979_at    | Tetraspanin 13                                                                                                                              | NM_014399 | 27075                      | 159.22 | 178.93 | 169.06 | 224.46  | 232.67  | 228.52  | 1.35 | 1.22 |
| 207809_s_at  | ATPase, H+ transporting, lysosomal accessory protein 1                                                                                      | NM_001183 | 537                        | 127.11 | 129.23 | 128.17 | 195.63  | 170.23  | 182.21  | 1.42 | 1.22 |
| 37226_at     | BCL2/adenovirus E1B 19kDa interacting protein 1                                                                                             | U15172    | 662                        | 36.94  | 42.85  | 40.38  | 59.24   | 57.18   | 58.26   | 1.44 | 1.22 |
| 200751_s_at  | heterogeneous nuclear ribonucleoprotein C (C1/C2)                                                                                           | BE89861   | 3183                       | 142.39 | 119.3  | 130.17 | 183.34  | 196.69  | 189.32  | 1.45 | 1.22 |
| 211475_s_at  | BCL2-associated athanogene                                                                                                                  | AF116273  | 573                        | 196.4  | 159.97 | 177.77 | 262.42  | 253.12  | 257.15  | 1.45 | 1.22 |
| 201875_s_at  | myelin protein zero-like 1                                                                                                                  | NM_024569 | 9019                       | 66.41  | 71.85  | 69.24  | 93.79   | 108.44  | 100.88  | 1.46 | 1.22 |
| 225954_s_at  | midnolin                                                                                                                                    | AL512725  | 90007                      | 55.89  | 42.13  | 48.74  | 75.1    | 77.39   | 76.02   | 1.56 | 1.22 |
| 200712_s_at  | microtubule-associated protein, RP/EB family, member 1                                                                                      | AI633566  | 22919                      | 42.27  | 60.92  | 52.14  | 82.67   | 85.27   | 83.77   | 1.61 | 1.22 |
| 211998_at    | H3 histone, family 3B (H3.3B)                                                                                                               | AW138159  | 3021                       | 53.42  | 37.46  | 46.04  | 85.22   | 72.92   | 79.09   | 1.72 | 1.22 |
| 202552_s_at  | cysteine rich transmembrane BMP regulator 1 (chordin-like)                                                                                  | NM_016441 | 51232                      | 66.92  | 65.41  | 66.05  | 90.57   | 85.27   | 88.06   | 1.33 | 1.23 |
| 215719_x_at  | Fas (TNF receptor superfamily, member 6)                                                                                                    | X83493    | 355                        | 129.07 | 125.34 | 127.14 | 171.22  | 170.58  | 170.8   | 1.34 | 1.23 |
| 200607_s_at  | RAD21 homolog (S. pombe)                                                                                                                    | BG289967  | 5885                       | 208.78 | 205.92 | 207.48 | 278.94  | 282.63  | 280.74  | 1.35 | 1.23 |
| 204670_x_at  | major histocompatibility complex, class II, DR beta 1                                                                                       | NM_002125 | 3123                       | 819.73 | 911.79 | 865.93 | 1170.24 | 1188.96 | 1177.36 | 1.36 | 1.23 |
| 202246_s_at  | cyclin-dependent kinase 4                                                                                                                   | NM_000075 | 1019                       | 374.04 | 330.3  | 351.63 | 481.16  | 484.82  | 483.15  | 1.37 | 1.23 |
| 206332_s_at  | interferon, gamma-inducible protein 16                                                                                                      | NM_005531 | 3428                       | 411.54 | 463.93 | 438.89 | 631.51  | 584.38  | 608.61  | 1.39 | 1.23 |
| 202637_s_at  | intercellular adhesion molecule 1 (CD54), human rhinovirus receptor                                                                         | AI608725  | 3383                       | 319.79 | 350.47 | 335.6  | 490.37  | 449.98  | 470.31  | 1.4  | 1.23 |
| 221090_s_at  | 2-oxoglutarate and iron-dependent oxygenase domain containing 1                                                                             | NM_018233 | 55239                      | 63     | 62.18  | 62.62  | 84      | 92.28   | 88.03   | 1.41 | 1.23 |
| 210978_s_at  | transgelin 2                                                                                                                                | BC002616  | 8407                       | 205.28 | 238.19 | 222.19 | 319.42  | 311.4   | 315.78  | 1.42 | 1.23 |
| 218105_s_at  | mitochondrial ribosomal protein L4                                                                                                          | NM_015956 | 51073                      | 59.87  | 58.46  | 59.17  | 83.8    | 84.03   | 83.9    | 1.42 | 1.23 |
| 201523_x_at  | ubiquitin-conjugating enzyme E2N (UBC13 homolog, yeast)                                                                                     | BE262760  | 7334                       | 95.53  | 89.12  | 91.96  | 138.68  | 125.72  | 131.56  | 1.43 | 1.23 |
| 218229_s_at  | pogo transposable element with KRAB domain                                                                                                  | NM_017542 | 57645                      | 73.04  | 68.24  | 70.59  | 97.83   | 102.85  | 100.7   | 1.43 | 1.23 |
| 216252_x_at  | Fas (TNF receptor superfamily, member 6)                                                                                                    | Z70519    | 355                        | 90     | 105.01 | 96.56  | 143.22  | 137.56  | 140.13  | 1.45 | 1.23 |
| 218119_at    | translocase of inner mitochondrial membrane 23 homolog (yeast) /// similar to Mitochondrial import inner membrane translocase subunit Tim23 | NM_006327 | 10431 /// 653252           | 42.02  | 43.14  | 42.68  | 61.57   | 63.18   | 62.53   | 1.46 | 1.23 |
| 208629_s_at  | hydroxyacyl-Coenzyme A dehydrogenase/3-ketoacyl Coenzyme A thiolase/enoyl-Coenzyme A hydratase (trifunctional protein), alpha subunit       | BG472176  | 3030                       | 69.95  | 69.96  | 69.96  | 95.66   | 112.16  | 103.38  | 1.48 | 1.23 |
| 212432_at    | GrpE-like 1, mitochondrial (E. coli)                                                                                                        | AL542571  | 80273                      | 68.35  | 66.75  | 67.71  | 109.21  | 96.61   | 102.14  | 1.51 | 1.23 |
| 209270_at    | laminin, beta 3                                                                                                                             | L25541    | 3914                       | 29.29  | 29.76  | 29.51  | 42.17   | 47.71   | 44.84   | 1.52 | 1.23 |
| 208750_s_at  | ADP-ribosylation factor 1                                                                                                                   | AA580004  | 375                        | 50.76  | 40.25  | 46.03  | 70.08   | 75.22   | 72.42   | 1.57 | 1.23 |
| 209222_s_at  | oxysterol binding protein-like 2                                                                                                            | BC000296  | 9885                       | 46.71  | 46.8   | 46.75  | 63.74   | 62.79   | 63.21   | 1.35 | 1.24 |
| 202424_at    | mitogen-activated protein kinase kinase 2                                                                                                   | NM_030662 | 5605                       | 206.91 | 195.11 | 201.33 | 275.51  | 275.95  | 275.71  | 1.37 | 1.24 |
| 221267_s_at  | family with sequence similarity 108, member A1 /// family with sequence similarity 108, member A1                                           | NM_031213 | 81926                      | 122.88 | 111.27 | 117.24 | 160.73  | 166.23  | 163.52  | 1.39 | 1.24 |
| 238010_at    | chromosome 1 open reading frame 174                                                                                                         | BF970340  | 339448                     | 47.45  | 43.73  | 45.8   | 65.43   | 64.35   | 64.77   | 1.41 | 1.24 |
| 221770_at    | ribulose-5-phosphate-3-epimerase                                                                                                            | BE964473  | 6120                       | 46.58  | 40.28  | 43.38  | 63.28   | 63.77   | 63.48   | 1.46 | 1.24 |
| 1555812_a_at | Rho GDP dissociation inhibitor (GDI) beta                                                                                                   | AF498927  | 397                        | 58.41  | 52.74  | 55.83  | 83.52   | 79.22   | 81.48   | 1.46 | 1.24 |
| 202706_s_at  | uridine monophosphate synthetase (orotate phosphoribosyl transferase and orotidine-5'-decarboxylase)                                        | D86227    | 7372                       | 35.17  | 42.81  | 39.31  | 57.37   | 60.48   | 59.01   | 1.5  | 1.24 |
| 211012_s_at  | promyelocytic leukemia /// hypothetical protein LOC161527 /// similar to promyelocytic leukemia protein isoform 9                           | BC000080  | 161527 /// 5371 /// 652671 | 31.72  | 36.63  | 34.11  | 52.35   | 51.7    | 51.96   | 1.52 | 1.24 |
| 201571_s_at  | dCMP deaminase                                                                                                                              | AI656493  | 1635                       | 164.35 | 160.79 | 162.74 | 217.09  | 217.9   | 217.58  | 1.34 | 1.25 |
| 202284_s_at  | cyclin-dependent kinase inhibitor 1A (p21, Cip1)                                                                                            | NM_000389 | 1026                       | 135.58 | 139.34 | 137.26 | 179.85  | 189.17  | 184.41  | 1.34 | 1.25 |
| 220230_s_at  | cytochrome b5 reductase 2                                                                                                                   | NM_016229 | 51700                      | 380.91 | 363.71 | 371.08 | 500.81  | 493.82  | 496.53  | 1.34 | 1.25 |
| 224903_at    | cirrhosis, autosomal recessive 1A (cirhin)                                                                                                  | AL519818  | 84916                      | 471.22 | 508.74 | 491.37 | 679.42  | 652.69  | 666.18  | 1.36 | 1.25 |
| 201720_s_at  | lysosomal associated multispinning membrane protein 5                                                                                       | AI589086  | 7805                       | 181.36 | 171.43 | 176.05 | 239.58  | 242.25  | 240.91  | 1.37 | 1.25 |
| 209893_s_at  | fucosyltransferase 4 (alpha (1,3) fucosyltransferase, myeloid-specific)                                                                     | M58596    | 2526                       | 76.61  | 73.92  | 75.5   | 101.97  | 105.42  | 103.66  | 1.37 | 1.25 |
| 228204_at    | Proteasome (prosome, macropain) subunit, beta type, 4                                                                                       | AA630330  | 5692                       | 219.05 | 239.59 | 228.47 | 309.52  | 317.28  | 313.76  | 1.37 | 1.25 |
| 209995_s_at  | T-cell leukemia/lymphoma 1A /// T-cell leukemia/lymphoma 1A                                                                                 | BC003574  | 8115                       | 231.22 | 235.22 | 233.36 | 310.29  | 334.46  | 321.55  | 1.38 | 1.25 |
| 202361_at    | SEC24 related gene family, member C (S. cerevisiae)                                                                                         | NM_004922 | 9632                       | 86.31  | 83.69  | 84.85  | 119.06  | 117.22  | 117.93  | 1.39 | 1.25 |
| 210222_s_at  | reticulon 1                                                                                                                                 | BC000314  | 6252                       | 85.75  | 96.77  | 91.05  | 130.05  | 127.26  | 128.33  | 1.41 | 1.25 |
| 223666_at    | Sorting nexin 5                                                                                                                             | BC002724  | 27131                      | 101.21 | 98.72  | 99.94  | 147.48  | 136.17  | 141.14  | 1.41 | 1.25 |
| 205621_at    | alkB, alkylation repair homolog 1 (E. coli)                                                                                                 | NM_006020 | 8846                       | 48.63  | 54.44  | 51.44  | 72.54   | 74.6    | 73.59   | 1.43 | 1.25 |

|              |                                                                                                                                                                                                   |           |                |         |        |         |         |         |         |      |      |
|--------------|---------------------------------------------------------------------------------------------------------------------------------------------------------------------------------------------------|-----------|----------------|---------|--------|---------|---------|---------|---------|------|------|
| 223709_s_at  | wingless-type MMTV integration site family, member 10A                                                                                                                                            | AY009400  | 80326          | 73.47   | 68.37  | 70.73   | 107.26  | 100.44  | 103.63  | 1.47 | 1.25 |
| 226911_at    | EGF-like, fibronectin type III and laminin G domains                                                                                                                                              | BF114725  | 133584         | 47.95   | 54.17  | 50.64   | 72.98   | 76.3    | 74.52   | 1.47 | 1.25 |
| 233878_s_at  | 5'-3' exoribonuclease 2                                                                                                                                                                           | BE536170  | 22803          | 54.39   | 50.28  | 52.18   | 81.14   | 72.62   | 76.96   | 1.47 | 1.25 |
| 228867_at    | TatD DNase domain containing 3                                                                                                                                                                    | BE541548  | 128387         | 50.93   | 51.52  | 51.23   | 70.41   | 80.93   | 75.97   | 1.48 | 1.25 |
| 224410_s_at  | limb region 1 homolog (mouse) /// limb region 1 homolog (mouse)                                                                                                                                   | AF348513  | 64327          | 40.57   | 43.96  | 42.33   | 60.68   | 71.63   | 66.18   | 1.56 | 1.25 |
| 206929_s_at  | nuclear factor I/C (CCAAT-binding transcription factor)                                                                                                                                           | NM_005597 | 4782           | 43.94   | 27.34  | 35.65   | 65.02   | 63.79   | 64.49   | 1.81 | 1.25 |
| 39318_at     | T-cell leukemia/lymphoma 1A                                                                                                                                                                       | X82240    | 8115           | 447.84  | 443.23 | 445.24  | 575.29  | 602.95  | 589.14  | 1.32 | 1.26 |
| 202736_s_at  | LSM4 homolog, U6 small nuclear RNA associated (S. cerevisiae)                                                                                                                                     | AA112507  | 25804          | 128.58  | 124.02 | 126.35  | 171.33  | 172.65  | 171.98  | 1.36 | 1.26 |
| 224573_at    | similar to DNA segment, Chr 11, Brigham & Womens Genetics 0434 expressed                                                                                                                          | BE744389  | 440400         | 402.13  | 428.76 | 413.96  | 563.67  | 576.95  | 569.8   | 1.38 | 1.26 |
| 201168_x_at  | Rho GDP dissociation inhibitor (GDI) alpha                                                                                                                                                        | NM_004309 | 396            | 139.23  | 144.91 | 141.86  | 193.05  | 206.91  | 199.43  | 1.41 | 1.26 |
| 215714_s_at  | SWI/SNF related, matrix associated, actin dependent regulator of chromatin, subfamily a, member 4                                                                                                 | AF254822  | 6597           | 102.47  | 104.38 | 103.34  | 148.56  | 144.92  | 146.8   | 1.42 | 1.26 |
| 222425_s_at  | polymerase (DNA-directed), delta interacting protein 2                                                                                                                                            | AW151250  | 26073          | 49.36   | 49.65  | 49.5    | 75.84   | 71.44   | 73.84   | 1.49 | 1.26 |
| 204118_at    | CD48 molecule /// CD48 molecule                                                                                                                                                                   | NM_001778 | 962            | 148.59  | 179.66 | 163.93  | 252.39  | 246.45  | 248.73  | 1.52 | 1.26 |
| 218220_at    | chromosome 12 open reading frame 10                                                                                                                                                               | NM_021640 | 60314          | 48.57   | 49.86  | 49.3    | 77.96   | 71.31   | 74.96   | 1.52 | 1.26 |
| 1557910_at   | heat shock protein 90kDa alpha (cytosolic), class B member 1                                                                                                                                      | BG612458  | 3326           | 324.59  | 266.13 | 294.98  | 422.55  | 491.61  | 457.06  | 1.55 | 1.26 |
| 202357_s_at  | complement factor B                                                                                                                                                                               | NM_001710 | 629            | 71.24   | 79.75  | 75.33   | 131.85  | 106.64  | 119.23  | 1.58 | 1.26 |
| 201234_at    | integrin-linked kinase                                                                                                                                                                            | NM_004517 | 3611           | 235.39  | 241.25 | 238.24  | 325.34  | 320.26  | 322.97  | 1.36 | 1.27 |
| 208887_at    | eukaryotic translation initiation factor 3, subunit 4 delta, 44kDa                                                                                                                                | BC000733  | 8666           | 274.46  | 259.61 | 266.03  | 373.14  | 367.53  | 370.26  | 1.39 | 1.27 |
| 213175_s_at  | small nuclear ribonucleoprotein polypeptides B and B1                                                                                                                                             | AL049650  | 6628           | 615.89  | 576.14 | 593.49  | 819.34  | 841.62  | 827.71  | 1.39 | 1.27 |
| 208687_x_at  | heat shock 70kDa protein 8                                                                                                                                                                        | AF352832  | 3312           | 1067.69 | 973.61 | 1017.35 | 1378.72 | 1473.68 | 1427.39 | 1.4  | 1.27 |
| 217806_s_at  | polymerase (DNA-directed), delta interacting protein 2<br>queuine tRNA-ribosyltransferase 1 (tRNA-guanine transglycosylase) /// queuine tRNA-ribosyltransferase 1 (tRNA-guanine transglycosylase) | NM_015584 | 26073          | 88.34   | 90.08  | 89.04   | 129.45  | 122.27  | 125.72  | 1.41 | 1.27 |
| 221270_s_at  |                                                                                                                                                                                                   | NM_031209 | 81890          | 86.75   | 87.62  | 87.28   | 127.26  | 121.57  | 124.81  | 1.43 | 1.27 |
| 200927_s_at  | RAB14, member RAS oncogene family                                                                                                                                                                 | AA919115  | 51552          | 143.86  | 129.7  | 136.95  | 204.87  | 188.58  | 196.55  | 1.44 | 1.27 |
| 201562_s_at  | sorbitol dehydrogenase                                                                                                                                                                            | NM_003104 | 6652           | 41.01   | 41.22  | 41.09   | 57.74   | 62.51   | 59.71   | 1.45 | 1.27 |
| 223012_at    | UBX domain containing 1                                                                                                                                                                           | AF272894  | 80700          | 80.45   | 82.56  | 81.41   | 115.21  | 119.99  | 117.97  | 1.45 | 1.27 |
| 200841_s_at  | glutamyl-prolyl-tRNA synthetase                                                                                                                                                                   | AI142677  | 2058           | 112.4   | 100.24 | 106.17  | 148.53  | 163.42  | 155.87  | 1.47 | 1.27 |
| 204116_at    | interleukin 2 receptor, gamma (severe combined immunodeficiency)                                                                                                                                  | NM_000206 | 3561           | 103.72  | 122.95 | 113.87  | 176.84  | 164.34  | 170.22  | 1.49 | 1.27 |
| 219978_s_at  | nucleolar and spindle associated protein 1                                                                                                                                                        | NM_018454 | 51203          | 119.92  | 102.22 | 110.86  | 159.04  | 183.09  | 171.11  | 1.54 | 1.27 |
| 202094_at    | baculoviral IAP repeat-containing 5 (survivin)                                                                                                                                                    | AA648913  | 332            | 42.97   | 34.3   | 38.87   | 61.59   | 63.04   | 62.24   | 1.6  | 1.27 |
| 200953_s_at  | CDC37 cell division cycle 37 homolog (S. cerevisiae)                                                                                                                                              | U63131    | 11140          | 109.58  | 82.69  | 96.19   | 155.4   | 152.28  | 154.16  | 1.6  | 1.27 |
| 213887_s_at  | polymerase (RNA) II (DNA directed) polypeptide E, 25kDa                                                                                                                                           | AI654759  | 5434           | 58.81   | 48.19  | 53.37   | 87.08   | 83.46   | 85.2    | 1.6  | 1.27 |
| 208894_at    | major histocompatibility complex, class II, DR alpha /// major histocompatibility complex, class II, DR alpha                                                                                     | M60334    | 3122           | 290.85  | 288.99 | 289.98  | 394.49  | 415.44  | 405.74  | 1.4  | 1.28 |
| 209312_x_at  | major histocompatibility complex, class II, DR beta 1 /// major histocompatibility complex, class II, DR beta 1                                                                                   | U65585    | 3123           | 840.21  | 822.65 | 831.37  | 1127.01 | 1199.25 | 1160.1  | 1.4  | 1.28 |
| 200866_s_at  | prosaposin (variant Gaucher disease and variant metachromat leukodystrophy) /// phospholipid scramblase 3                                                                                         | M32221    | 5660 /// 57048 | 89.88   | 95.62  | 92.71   | 131.22  | 134.24  | 132.65  | 1.43 | 1.28 |
| 203931_s_at  | mitochondrial ribosomal protein L12                                                                                                                                                               | NM_002949 | 6182           | 201.01  | 181.63 | 190.55  | 282.12  | 268.13  | 274.8   | 1.44 | 1.28 |
| 229713_at    | CDNA FLJ13267 fis, clone OVARC1000964                                                                                                                                                             | AW665227  |                | 108.21  | 121.78 | 114.86  | 168.44  | 163.67  | 166.32  | 1.45 | 1.28 |
| 200736_s_at  | glutathione peroxidase 1                                                                                                                                                                          | NM_000581 | 2876           | 202.55  | 181.09 | 190.83  | 290.67  | 272.43  | 281.76  | 1.48 | 1.28 |
| 207831_x_at  | deoxyhypusine synthase                                                                                                                                                                            | NM_013407 | 1725           | 71.28   | 83.97  | 77.13   | 120.87  | 114.36  | 117.61  | 1.52 | 1.28 |
| 218493_at    | chromosome 16 open reading frame 33                                                                                                                                                               | NM_024571 | 79622          | 72.96   | 70.58  | 71.56   | 114.96  | 103.32  | 108.98  | 1.52 | 1.28 |
| 215728_s_at  | acyl-CoA thioesterase 7                                                                                                                                                                           | AL031848  | 11332          | 43.6    | 37.03  | 40.67   | 62.9    | 63.7    | 63.39   | 1.56 | 1.28 |
| 217786_at    | protein arginine methyltransferase 5                                                                                                                                                              | NM_006109 | 10419          | 92.38   | 75.61  | 84.92   | 138.51  | 130.1   | 133.52  | 1.57 | 1.28 |
| 205996_s_at  | adenylate kinase 2                                                                                                                                                                                | NM_013411 | 204            | 56.87   | 57.34  | 57.12   | 85.51   | 82.35   | 83.9    | 1.47 | 1.29 |
| 222531_s_at  | chromosome 14 open reading frame 108                                                                                                                                                              | AW137526  | 55745          | 84.67   | 81.74  | 82.59   | 126.37  | 116.09  | 121.19  | 1.47 | 1.29 |
| 201946_s_at  | chaperonin containing TCP1, subunit 2 (beta)                                                                                                                                                      | AL545982  | 10576          | 214.39  | 191.38 | 202.94  | 287.54  | 331.15  | 308.64  | 1.52 | 1.29 |
| 217362_x_at  | major histocompatibility complex, class II, DR beta 6 (pseudogene)                                                                                                                                | AF005487  | 3128           | 41.85   | 36.93  | 39.47   | 64.04   | 60.52   | 61.95   | 1.57 | 1.29 |
| 212379_at    | phosphoribosylglycinamide formyltransferase, phosphoribosylglycinamide synthetase, phosphoribosylaminoimidazole synthetase                                                                        | BE966876  | 2618           | 51.79   | 46.84  | 49.36   | 73.71   | 85.15   | 79.28   | 1.61 | 1.29 |
| 223318_s_at  | alkB, alkylation repair homolog 7 (E. coli)                                                                                                                                                       | BC004393  | 84266          | 40.04   | 33.76  | 36.88   | 61.01   | 62.21   | 61.56   | 1.67 | 1.29 |
| 208306_x_at  | Major histocompatibility complex, class II, DR beta 1                                                                                                                                             | NM_021983 | 3123           | 728.97  | 773.36 | 752.51  | 1033.17 | 1088.32 | 1057.13 | 1.4  | 1.3  |
| 208675_s_at  | dolichyl-diphosphooligosaccharide-protein glycosyltransferase                                                                                                                                     | D29643    | 1650           | 338.95  | 355.49 | 348.18  | 503.49  | 489.64  | 495.81  | 1.42 | 1.3  |
| 200722_s_at  | GPI-anchored membrane protein 1                                                                                                                                                                   | BG258784  | 4076           | 88.95   | 95.19  | 91.88   | 132.48  | 135.68  | 134.28  | 1.46 | 1.3  |
| 221069_s_at  | coiled-coil domain containing 44                                                                                                                                                                  | NM_016360 | 51204          | 41.15   | 43.58  | 42.63   | 65.55   | 64.24   | 64.87   | 1.52 | 1.3  |
| 221550_at    | COX15 homolog, cytochrome c oxidase assembly protein (yeast)                                                                                                                                      | BC002382  | 1355           | 37.34   | 42.53  | 40.2    | 61.76   | 67.08   | 64.33   | 1.6  | 1.3  |
| 202118_s_at  | copine III                                                                                                                                                                                        | AA541758  | 8895           | 68.98   | 61.68  | 65.17   | 95.47   | 113.71  | 104.78  | 1.61 | 1.3  |
| 213104_at    | hypothetical protein MGC24381                                                                                                                                                                     | AI799802  | 115939         | 32.37   | 23.87  | 28.25   | 45.81   | 50.06   | 48.06   | 1.7  | 1.3  |
| 202862_at    | fumarylacetoacetate hydrolase (fumarylacetoacetase)                                                                                                                                               | NM_000137 | 2184           | 85.66   | 80.71  | 83.19   | 120.01  | 122.41  | 120.93  | 1.45 | 1.31 |
| 203013_at    | ecdysoneless homolog (Drosophila)                                                                                                                                                                 | NM_007265 | 11319          | 78.42   | 79.59  | 78.91   | 110.88  | 121.01  | 116.11  | 1.47 | 1.31 |
| 228582_x_at  | Metastasis associated lung adenocarcinoma transcript 1 (non-coding RNA)                                                                                                                           | AI475544  | 378938         | 130.19  | 123.2  | 126.91  | 181.1   | 203.22  | 191.33  | 1.51 | 1.31 |
| 214836_x_at  | immunoglobulin kappa constant /// immunoglobulin kappa variable 1-5                                                                                                                               | BG536224  | 28299 /// 3514 | 65.05   | 71.88  | 68.93   | 100.72  | 113.31  | 106.6   | 1.55 | 1.31 |
| 1555730_a_at | cofilin 1 (non-muscle)                                                                                                                                                                            | D00682    | 1072           | 233.42  | 203.68 | 219.04  | 373.43  | 332.44  | 354.76  | 1.62 | 1.31 |



|              |                                                                                                                                                                                                                                                                                   |           |                                                               |         |         |         |         |         |         |      |      |
|--------------|-----------------------------------------------------------------------------------------------------------------------------------------------------------------------------------------------------------------------------------------------------------------------------------|-----------|---------------------------------------------------------------|---------|---------|---------|---------|---------|---------|------|------|
| 205965_at    | basic leucine zipper transcription factor, ATF-like                                                                                                                                                                                                                               | NM_006399 | 10538                                                         | 513.82  | 461.76  | 485.77  | 774     | 697.77  | 735.88  | 1.51 | 1.32 |
| 225823_at    | hypothetical protein P117                                                                                                                                                                                                                                                         | AA699669  | 125988                                                        | 83.75   | 75.65   | 79.49   | 117.06  | 131.82  | 123.84  | 1.56 | 1.32 |
| 204683_at    | intercellular adhesion molecule 2                                                                                                                                                                                                                                                 | NM_000873 | 3384                                                          | 44.66   | 44.12   | 44.37   | 74.3    | 64.79   | 69.57   | 1.57 | 1.32 |
| 211600_at    | gb:U20489.1 /DB_XREF=gi:885925 /GEN=GLEPP1 /FEA=FLmRNA /CNT=1 /TID=HsAffx.900321.277 /TIER=FL /STK=0 /DEF=Human glomerular epithelial protein 1 (GLEPP1) mRNA, complete cds. /PROD=glomerular epithelial protein 1 /FL=gb:U20489.1                                                | U20489    |                                                               | 661.4   | 556.65  | 610.28  | 907.29  | 1073.59 | 991.58  | 1.62 | 1.32 |
| 211716_x_at  | Rho GDP dissociation inhibitor (GDI) alpha /// Rho GDP dissociation inhibitor (GDI) alpha                                                                                                                                                                                         | BC005851  | 396                                                           | 297.22  | 292.48  | 294.83  | 406     | 421.58  | 413.44  | 1.4  | 1.33 |
| 217388_s_at  | kynureninase (L-kynurenine hydrolase)                                                                                                                                                                                                                                             | D56639    | 8942                                                          | 373.53  | 372.97  | 373.17  | 540.06  | 519.84  | 529.28  | 1.42 | 1.33 |
| 202799_at    | ClpP caseinolytic peptidase, ATP-dependent, proteolytic subunit homolog (E. coli)                                                                                                                                                                                                 | NM_006012 | 8192                                                          | 155.55  | 153.66  | 154.6   | 231.24  | 222.9   | 227.58  | 1.47 | 1.33 |
| 222703_s_at  | yrnC domain containing (E. coli)                                                                                                                                                                                                                                                  | BE464161  | 79693                                                         | 72.52   | 75.31   | 74.02   | 104.3   | 115.77  | 110.4   | 1.49 | 1.33 |
| 208965_s_at  | Interferon, gamma-inducible protein 16                                                                                                                                                                                                                                            | BG256677  | 3428                                                          | 149.52  | 122.92  | 136.14  | 210.88  | 241.81  | 224.92  | 1.65 | 1.33 |
| 231821_x_at  | hypothetical protein LOC284701 /// hypothetical gene supported by AK024248; AL137733 /// hypothetical gene supported by AK093729; BX647918 /// hypothetical protein LOC641693 /// hypothetical protein LOC642788 /// similar to hypothetical gene supported by AK024248; AL137733 | AK024248  | 284701 /// 401149 /// 441124 /// 641693 /// 642788 /// 653056 | 26.15   | 46.46   | 36.33   | 74.01   | 69.86   | 72.06   | 1.98 | 1.33 |
| 225647_s_at  | cathepsin C                                                                                                                                                                                                                                                                       | AI246687  | 1075                                                          | 131.75  | 130.29  | 130.83  | 190.12  | 187.09  | 188.69  | 1.44 | 1.34 |
| 201391_at    | TNF receptor-associated protein 1                                                                                                                                                                                                                                                 | NM_016292 | 10131                                                         | 245.4   | 229.29  | 237.58  | 343.18  | 346.75  | 344.96  | 1.45 | 1.34 |
| 202475_at    | transmembrane protein 147                                                                                                                                                                                                                                                         | NM_006326 | 10430                                                         | 177.1   | 199.23  | 188.53  | 283.41  | 286.88  | 284.74  | 1.51 | 1.34 |
| 203105_s_at  | dynamitin 1-like                                                                                                                                                                                                                                                                  | NM_012062 | 10059                                                         | 100.78  | 92.59   | 96.91   | 150.34  | 145.99  | 148.38  | 1.53 | 1.34 |
| 216483_s_at  | chromosome 19 open reading frame 10                                                                                                                                                                                                                                               | AC005339  | 56005                                                         | 88.06   | 75.31   | 82.11   | 130.19  | 125.3   | 127.57  | 1.55 | 1.34 |
| 210154_at    | malic enzyme 2, NAD(+)-dependent, mitochondrial                                                                                                                                                                                                                                   | M55905    | 4200                                                          | 37.74   | 41.63   | 39.6    | 65.43   | 61.25   | 63.12   | 1.59 | 1.34 |
| 203109_at    | ubiquitin-conjugating enzyme E2M (UBC12 homolog, yeast)                                                                                                                                                                                                                           | NM_003969 | 9040                                                          | 75.02   | 59.52   | 67.23   | 109.31  | 112.37  | 111.06  | 1.65 | 1.34 |
| 215241_at    | transmembrane protein 16C                                                                                                                                                                                                                                                         | AJ300461  | 63982                                                         | 44.76   | 36.54   | 40.13   | 66.84   | 71.29   | 69.4    | 1.73 | 1.34 |
| 1553551_s_at | similar to NADH-ubiquinone oxidoreductase chain 2 (NADH dehydrogenase subunit 2)                                                                                                                                                                                                  | NM_173709 | 643788                                                        | 1375.43 | 1375.45 | 1375.44 | 1952.21 | 2152.52 | 2051.44 | 1.49 | 1.35 |
| 201476_s_at  | ribonucleotide reductase M1 polypeptide                                                                                                                                                                                                                                           | AI692974  | 6240                                                          | 280.42  | 249.13  | 264.46  | 388.88  | 425.85  | 407.18  | 1.54 | 1.35 |
| 223578_x_at  | PRO1073 protein                                                                                                                                                                                                                                                                   | AF113016  | 29005                                                         | 111.63  | 104.96  | 107.87  | 163.72  | 179.15  | 170.87  | 1.58 | 1.36 |
| 212338_at    | myosin ID                                                                                                                                                                                                                                                                         | AA621962  | 4642                                                          | 46      | 46.48   | 46.24   | 86.43   | 70.96   | 78.63   | 1.7  | 1.36 |
| 200883_at    | ubiquinol-cytochrome c reductase core protein II                                                                                                                                                                                                                                  | NM_003366 | 7385                                                          | 145.81  | 133.47  | 140.13  | 212.49  | 209.37  | 211.02  | 1.51 | 1.37 |
| 223037_at    | PDZ domain containing 11                                                                                                                                                                                                                                                          | AF151061  | 51248                                                         | 116.64  | 121.8   | 119.55  | 179.47  | 183.76  | 181.59  | 1.52 | 1.37 |
| 214359_s_at  | heat shock protein 90kDa alpha (cytosolic), class B member 1                                                                                                                                                                                                                      | AI218219  | 3326                                                          | 279.39  | 257.19  | 268.73  | 431.56  | 398.55  | 415.36  | 1.55 | 1.37 |
| 202151_s_at  | ubiquitin associated domain containing 1                                                                                                                                                                                                                                          | NM_016172 | 10422                                                         | 91.89   | 94.72   | 93.12   | 149.28  | 147.34  | 148.55  | 1.6  | 1.37 |
| 201118_at    | phosphogluconate dehydrogenase /// phosphogluconate dehydrogenase /// UDP-glucose dehydrogenase /// UDP-glucose dehydrogenase                                                                                                                                                     | NM_002631 | 5226 /// 7358                                                 | 75.01   | 79.57   | 76.82   | 119.32  | 129.96  | 124.75  | 1.62 | 1.37 |
| 212401_s_at  | cell division cycle 2-like 1 (PITSLRE proteins) /// cell division cycle 2-like 2 (PITSLRE proteins)                                                                                                                                                                               | AI767436  | 984 /// 985                                                   | 63.67   | 58.52   | 61.38   | 114.99  | 98.19   | 106.74  | 1.74 | 1.37 |
| 212411_at    | IMP4, U3 small nucleolar ribonucleoprotein, homolog (yeast)                                                                                                                                                                                                                       | BE747342  | 92856                                                         | 81.82   | 74.89   | 77.84   | 119.26  | 122.21  | 121.06  | 1.56 | 1.38 |
| 202697_at    | nudix (nucleoside diphosphate linked moiety X)-type motif 21 serpin peptidase inhibitor, clade A (alpha-1 antiproteinase, antitrypsin), member 1                                                                                                                                  | NM_007006 | 11051                                                         | 65.55   | 72.83   | 69.53   | 110.23  | 117.5   | 113.97  | 1.64 | 1.4  |
| 202833_s_at  | CDNA clone IMAGE:3831740                                                                                                                                                                                                                                                          | BE891646  |                                                               | 167.41  | 154.1   | 161.25  | 246.56  | 256.86  | 251.04  | 1.56 | 1.41 |
| 212016_s_at  | polypyrimidine tract binding protein 1                                                                                                                                                                                                                                            | AA679988  | 5725                                                          | 65.92   | 58.58   | 62.48   | 100.42  | 99.12   | 99.67   | 1.6  | 1.41 |
| 232221_at    | SCO cytochrome oxidase deficient homolog 1 (yeast)                                                                                                                                                                                                                                | AF183424  | 6341                                                          | 69.34   | 69.49   | 69.41   | 108.3   | 114.49  | 111.2   | 1.6  | 1.41 |
| 233029_at    | KIAA1639 protein                                                                                                                                                                                                                                                                  | AB046859  | 57729                                                         | 53.87   | 61.25   | 57.48   | 108.51  | 92.1    | 100.02  | 1.74 | 1.41 |
| 217791_s_at  | aldehyde dehydrogenase 18 family, member A1                                                                                                                                                                                                                                       | NM_002860 | 5832                                                          | 158.7   | 156.2   | 157.52  | 238.02  | 238.94  | 238.63  | 1.51 | 1.42 |
| 217741_s_at  | zinc finger, AN1-type domain 5                                                                                                                                                                                                                                                    | AW471220  | 7763                                                          | 65.31   | 75.11   | 71.11   | 117.58  | 114.12  | 115.86  | 1.63 | 1.42 |
| 238623_at    | CDNA FLJ37310 fis, clone BRAMY201670E                                                                                                                                                                                                                                             | AI633559  |                                                               | 87.44   | 98.22   | 93.12   | 150.96  | 153.33  | 152.23  | 1.63 | 1.42 |
| 1564494_s_at | procollagen-proline, 2-oxoglutarate 4-dioxygenase (proline 4-hydroxylase), beta polypeptide                                                                                                                                                                                       | AK075503  | 5034                                                          | 44.4    | 42.98   | 43.64   | 78.41   | 72.44   | 75.6    | 1.73 | 1.42 |
| 206343_s_at  | neuregulin 1                                                                                                                                                                                                                                                                      | NM_013959 | 3084                                                          | 62.09   | 57.65   | 60.42   | 95.52   | 100.67  | 97.97   | 1.62 | 1.43 |
| 210663_s_at  | kynureninase (L-kynurenine hydrolase)                                                                                                                                                                                                                                             | BC000879  | 8942                                                          | 134.81  | 128.46  | 131.34  | 210.89  | 210.36  | 210.68  | 1.6  | 1.47 |
| 155464_a_at  | cartilage associated protein                                                                                                                                                                                                                                                      | BC008745  | 10491                                                         | 39.53   | 38.37   | 39.01   | 62.28   | 67.81   | 64.85   | 1.66 | 1.47 |
| 221782_at    | DnaJ (Hsp40) homolog, subfamily C, member 10                                                                                                                                                                                                                                      | BG168666  | 54431                                                         | 42.29   | 39.85   | 40.73   | 74.09   | 69.28   | 71.57   | 1.76 | 1.48 |
| 210338_s_at  | heat shock 70kDa protein 8                                                                                                                                                                                                                                                        | AB034951  | 3312                                                          | 402.55  | 349.05  | 375.86  | 632.41  | 634.13  | 633.28  | 1.68 | 1.49 |
| 223360_at    | chromosome 21 open reading frame 56                                                                                                                                                                                                                                               | AL136871  | 84221                                                         | 30.06   | 27.64   | 28.65   | 54.27   | 52.42   | 53.44   | 1.87 | 1.49 |
| 203828_s_at  | interleukin 32 /// interleukin 32                                                                                                                                                                                                                                                 | NM_004221 | 9235                                                          | 139.08  | 141.85  | 140.23  | 234.31  | 227.9   | 231.89  | 1.65 | 1.51 |
| 1555226_s_at | chromosome 1 open reading frame 43                                                                                                                                                                                                                                                | BC008306  | 25912                                                         | 95.17   | 88.7    | 91.58   | 155.87  | 165.19  | 161.08  | 1.76 | 1.53 |
| 208677_s_at  | basigin (Ok blood group)                                                                                                                                                                                                                                                          | AL550657  | 682                                                           | 99.86   | 94.35   | 97.23   | 168.7   | 162.65  | 166.05  | 1.71 | 1.54 |
| 225070_at    | chromosome 6 open reading frame 68                                                                                                                                                                                                                                                | BF112132  | 116150                                                        | 84.58   | 81.01   | 82.65   | 142.34  | 150.14  | 145.93  | 1.77 | 1.55 |
| 37079_at     | YDD19 protein                                                                                                                                                                                                                                                                     | U82319    | 11049                                                         | 39.95   | 37.46   | 38.73   | 67.04   | 85.66   | 76.43   | 1.97 | 1.55 |
| 225071_at    | chromosome 6 open reading frame 68                                                                                                                                                                                                                                                | BG168247  | 116150                                                        | 188.56  | 197.11  | 192.48  | 318.61  | 340.32  | 329.09  | 1.71 | 1.57 |
| 209692_at    | eyes absent homolog 2 (Drosophila)                                                                                                                                                                                                                                                | U71207    | 2139                                                          | 37.49   | 42.96   | 40.43   | 73.01   | 78.56   | 75.81   | 1.88 | 1.57 |
| 49306_at     | Ras association (RalGDS/AF-6) domain family 4                                                                                                                                                                                                                                     | AI890191  | 83937                                                         | 36.48   | 31.75   | 33.9    | 65.7    | 62.78   | 64.2    | 1.89 | 1.57 |
| 219049_at    | chondroitin beta1,4 N-acetylgalactosaminyltransferase stress-induced-phosphoprotein 1 (Hsp70/Hsp90-organizing protein)                                                                                                                                                            | NM_018371 | 55790                                                         | 53.38   | 46.55   | 50.41   | 95.77   | 92.42   | 94.63   | 1.88 | 1.58 |
| 212009_s_at  | stromal cell derived factor 4                                                                                                                                                                                                                                                     | AL553320  | 10963                                                         | 35.47   | 41.09   | 37.93   | 69.25   | 74.48   | 72.01   | 1.9  | 1.59 |
| 221972_s_at  | Hypothetical protein LOC646201                                                                                                                                                                                                                                                    | AL571362  | 51150                                                         | 151.62  | 164.02  | 158     | 317.21  | 278.26  | 297.3   | 1.88 | 1.62 |
| 229640_x_at  | YDD19 protein /// similar to CG4775-PA /// similar to CG4775-PA                                                                                                                                                                                                                   | AW439242  | 646201                                                        | 159.44  | 164.1   | 161.29  | 290.37  | 331.6   | 310.81  | 1.93 | 1.66 |
| 215207_x_at  | serpin peptidase inhibitor, clade A (alpha-1 antiproteinase, antitrypsin), member 6                                                                                                                                                                                               | BF695847  | 11049 /// 389850 /// 654174                                   | 50.75   | 48.35   | 49.27   | 93.74   | 111.13  | 102.38  | 2.08 | 1.73 |
| 206325_at    | thyroid peroxidase                                                                                                                                                                                                                                                                | NM_001756 | 866                                                           | 51.63   | 39.92   | 46.1    | 105.36  | 102.59  | 104.24  | 2.26 | 1.79 |
| 210342_s_at  | amiloride binding protein 1 (amine oxidase (copper-containing))                                                                                                                                                                                                                   | M17755    | 7173                                                          | 66.34   | 69.54   | 67.75   | 134.47  | 141.22  | 137.66  | 2.03 | 1.82 |
| 203559_s_at  |                                                                                                                                                                                                                                                                                   | NM_001091 | 26                                                            | 21.51   | 16.89   | 19.07   | 46.57   | 48.04   | 47.13   | 2.47 | 1.85 |

**Supplementary Table S3:** Frequency of *CIITA* rearrangements detected by FISH in 263 B cell lymphomas

| Histology                                   | # samples | <i>CIITA</i> break-apart (%) | Unbalanced rearrangements (%) |
|---------------------------------------------|-----------|------------------------------|-------------------------------|
| Diffuse large B cell lymphoma (DLBCL)       | 131       | 4 (3%)                       | 3 (75%)                       |
| Primary mediastinal B cell lymphoma (PMBCL) | 77        | 29 (38%)*                    | 13 (45%)                      |
| Classical Hodgkin lymphoma (cHL)            | 55        | 8 (15%)                      | 4 (50%)                       |
| All cases                                   | 263       | 41 (16%)                     | 20 (49%)                      |

\*significant overrepresentation compared to all cases:  $p < 0.0001$

**Supplementary Table S4:** Clinical characteristics in a selected cohort of 57 patients with PMBCL, homogeneously treated with CHOP or CHOP-like chemotherapy

|                                                   | <b><i>CIITA</i><sup>+</sup></b> (n=22) <sup>‡</sup> | <b><i>CIITA</i><sup>-</sup></b> (n=35) | <b>p-value</b> |
|---------------------------------------------------|-----------------------------------------------------|----------------------------------------|----------------|
| <b>Age in years:</b><br>mean (SD)                 | 37.5 (15.3)                                         | 40.0 (16.9)                            | p=0.604        |
| <b>Gender (%)</b><br>Male<br>Female               | 68<br>32                                            | 46<br>54                               | p=0.097        |
| <b>Mass size in cm:</b><br>mean (SD)              | 12.1 (2.2)                                          | 10.9 (4.4)                             | p=0.158        |
| <b>LDH (%)</b><br>Normal<br>Elevated              | 18<br>82                                            | 26<br>74                               | p=0.509        |
| <b>Extranodal sites (%)</b><br>0-1<br>>1          | 52<br>48                                            | 72<br>28                               | p=0.068        |
| <b>Clinical stage (%)</b><br>limited*<br>advanced | 5<br>95                                             | 14<br>86                               | p=0.243        |
| <b>Performance Status<br/>2-4 (WHO) (%)</b>       | 36.4                                                | 34.3                                   | p=0.226        |
| <b>IPI Score (%)</b><br>0-2<br>3-5                | 59<br>41                                            | 77<br>23                               | p=0.147        |
| <b>CHOP or CHOP-like<br/>polychemotherapy (%)</b> | 100                                                 | 100                                    | p=1.000        |
| <b>Radiation therapy (%)</b>                      | 36.4                                                | 37.1                                   | p=0.953        |

<sup>‡</sup> *CIITA*<sup>+</sup> = *CIITA* break-apart present; *CIITA*<sup>-</sup> = *CIITA* break-apart absent

\*limited=stage I/II and maximal tumor diameter <10 cm and the absence of B symptoms

SD = standard deviation



**Supplementary Table S5:** Cox regression model for disease-specific survival in 57 patients with PMBCL

| Variable                                  | Class    | N (%)      | Univariate analysis p-value | Multivariate analysis p-value |
|-------------------------------------------|----------|------------|-----------------------------|-------------------------------|
| <b>Fluorescence in situ hybridization</b> |          |            |                             |                               |
| <i>CIITA</i> rearrangement                | present  | 22 (38.6%) | 0.043                       | 0.013                         |
| <b>Clinical parameters</b>                |          |            |                             |                               |
| Age (years)                               | >60      | 6 (10.5%)  | 0.622                       |                               |
| Ann Arbor Stage                           | III,IV   | 16 (28.1%) | 0.347                       |                               |
| Serum LDH                                 | elevated | 44 (77.2%) | 0.0001                      | 0.0008                        |
| WHO performance status                    | >1       | 20 (35.1%) | 0.301                       |                               |
| Number of extranodal sites                | >1       | 21 (36.8%) | 0.144                       |                               |
| IPI score                                 | >2       | 17 (29.8%) | 0.042                       |                               |

<sup>1)</sup> Univariate Cox proportional hazards regression model

<sup>2)</sup> Multivariate Cox proportional hazards regression model (forward stepwise, likelihood ratio)

IPI = International Prognostic Index

**Supplementary Table S6:** Translocation partners of *CIITA* resulting in expressed gene fusions (identified by RNA-seq and *CIITA* 3' RACE)

| Sample | Translocation partners          |                                                                         | Chromosomal location | Retained <i>CIITA</i> exons | Reading frame of fusion partner | Putative translation*                                                 |
|--------|---------------------------------|-------------------------------------------------------------------------|----------------------|-----------------------------|---------------------------------|-----------------------------------------------------------------------|
|        | Gene symbol (HGNC database)     | Description                                                             |                      |                             |                                 |                                                                       |
| KM-H2  | <b><i>BX648577</i></b>          | hypothetical LOC145788                                                  | 15q21.3              | 1-4                         | conserved                       | <i>CIITA</i> N-terminus (119aa), <i>BX648577</i> C-terminus (136aa)   |
| #5     | <b><i>CD274</i></b>             | programmed cell death 1 ligand 1, <i>CD274</i> antigen, B7-H1           | 9p24.1               | 1                           | conserved                       | Wild type <i>CD274</i> (+22aa N-terminus <i>CIITA</i> )               |
| #6,#7  | <b><i>CD273</i><sup>†</sup></b> | programmed cell death 1 ligand 2, <i>CD273</i> antigen, <i>PDCD1LG2</i> | 9p24.1               | 1                           | conserved                       | Wild type <i>CD273</i> <sup>††</sup>                                  |
| #1     | <b><i>RUNDC2A</i></b>           | RUN domain containing 2A                                                | 16p13.13             | 1                           | conserved                       | Wild type <i>RUNDC2A</i> (+22aa N-terminus <i>CIITA</i> )             |
| #6     | <b><i>RALGDS</i></b>            | ras guanine nucleotide dissociation stimulator                          | 9q34.3               | 1                           | disrupted                       | Truncated <i>CIITA</i> (24aa) with large C-terminal deletion          |
| #3     | <b><i>C16ORF75</i></b>          | chromosome 16 open reading frame 75, <i>RMI2</i>                        | 16p13.13             | 1                           | disrupted                       | Truncated <i>CIITA</i> with additional intron-derived sequence (56aa) |

\*For cDNA sequence and amino acid sequence see supplemental text; aa = amino acids.

<sup>†</sup> Identical fusion transcript was found in two cases

<sup>††</sup> Missense mutations in *CIITA* translational start codon

**Supplementary Table S7: Primer sequences used for validation**

| Name                           | Sequence                                           | Purpose                                                   |
|--------------------------------|----------------------------------------------------|-----------------------------------------------------------|
| <i>CIITA F1</i>                | G TTCAGCAGGCTGTTGTGTG                              | <i>CIITA-BX648577</i> RT-PCR                              |
| <i>BX648577 R1</i>             | TTCACACAAGGAGGCAGTTG                               | <i>CIITA-BX648577</i> RT-PCR                              |
| <i>CIITA F4</i>                | CTGCTGGGTCCTACCTGTCAGAG                            | <i>CIITA</i> 3'RACE and genomic <i>CIITA-BX648577</i> PCR |
| <i>CIITA F5</i>                | <u>TG TAAAACGACGGCCAGT</u><br>CTGCTCCACCGGCTCAGG   | <i>CIITA</i> 3'RACE (nested)                              |
| <i>BX648577 R2</i>             | GCAGTCGCAGCTCATTGTAA                               | genomic <i>CIITA-BX648577</i> PCR                         |
| <i>CIITA F3</i>                | <u>TG TAAAACGACGGCCAGT</u><br>AAGGCATCCTTGGGGAAG   | <i>CIITA-Fusion</i> RT-PCR                                |
| <i>CIITA exon 3 F (q)</i>      | GTGACATGGAAGGTGATGAAGA                             | <i>CIITA- BX648577</i> qRT-PCR                            |
| <i>BX648577 intron 1 R (q)</i> | AAAGCCTGTTTGGTGGTCTCT                              | <i>CIITA- BX648577</i> qRT-PCR                            |
| <i>ELMO1 F2</i>                | <u>TG TAAAACGACGGCCAGT</u><br>CGTCAAGGTGGCCATAGAAT | <i>ELMO1-SLCO3A1</i> RT-PCR                               |
| <i>SLCO3A1 R1</i>              | <u>CAGGAAACAGCTATGAC</u><br>TGTGGAAACCCAAACATCAA   | <i>ELMO1-SLCO3A1</i> RT-PCR                               |
| <i>BAT2L1 F1</i>               | <u>TG TAAAACGACGGCCAGT</u><br>GCGGAACCAGACCAGGTAC  | <i>BAT2L1-MGMT</i> RT-PCR                                 |
| <i>MGMT R4</i>                 | <u>CAGGAAACAGCTATGAC</u><br>CTCGGGCTGGTGGAAATAG    | <i>BAT2L1-MGMT</i> RT-PCR                                 |
| <i>CD274 R3</i>                | <u>CAGGAAACAGCTATGAC</u><br>TCACTGCTTGTCCAGATGACTT | <i>CIITA-CD274</i> RT-PCR                                 |

|                       |                                                    |                                |
|-----------------------|----------------------------------------------------|--------------------------------|
| <i>CD274 F (q)</i>    | TGACCTACTGGCATTGCTG                                | <i>CIITA-CD274</i> qRT-PCR     |
| <i>CD274 R (q)</i>    | TGAACCTTCAGGTCTTCCTCTC                             | <i>CIITA-CD274</i> qRT-PCR     |
| <i>PDCD1LG2 R3</i>    | <u>CAGGAAACAGCTATGAC</u><br>CAGAACACTGGTGACCTGGTAG | <i>CIITA- PDCD1LG2</i> RT-PCR  |
| <i>PDCD1LG2 F (q)</i> | CCTGGGACTACAAGTACCTGAC                             | <i>CIITA- PDCD1LG2</i> qRT-PCR |
| <i>PDCD1LG2 R (q)</i> | CAGAACACTGGTGACCTGGTAG                             | <i>CIITA- PDCD1LG2</i> qRT-PCR |
| <i>RALGDS R3</i>      | <u>CAGGAAACAGCTATGAC</u><br>GATGCAGCCGTATCTAGAGGAG | <i>CIITA-RALGDS</i> RT-PCR     |
| <i>RUNDC2A R2</i>     | <u>CAGGAAACAGCTATGAC</u><br>CGTTCAAATCCTTGTTGTCG   | <i>CIITA- RUNDC2A</i> RT-PCR   |
| <i>C16ORF75 R1</i>    | <u>CAGGAAACAGCTATGAC</u><br>TGTGGTGTTCACACCTGTA    | <i>CIITA- C16ORF75</i> RT-PCR  |

Underlined: M13 sequence tags

**Sequences:**

**1) Full length *CIITA-BX648577* (BX648577.1) cDNA in KM-H2 (longest transcript) and putative translation (used for forced expression in SUDHL4).** Expressed “intronic” *BX648577* sequence underlined. Translational start and stop codons in bold.

GGTTAGTGATGAGGCTAGTGATGAGGCTGTGTGCTTCTGAGCTGGGCATCCGAAG  
 GCATCCTTGGGGAAGCTGAGGGCACGAGGAGGGGCTGCCAGACTCCGGGAGCT  
 GCTGCCTGGCTGGGATTCTACACA**ATG**CGTTGCCTGGCTCCACGCCCTGCTGGG  
 TCCTACCTGTCAGAGCCCCAAGGCAGCTCACAGTGTGCCACCATGGAGTTGGGGC  
 CCCTAGAAGGTGGCTACCTGGAGCTTCTTAACAGCGATGCTGACCCCCTGTGCCT  
 CTACCACTTCTATGACCAGATGGACCTGGCTGGAGAAGAAGAGATTGAGCTCTACT  
 CAGAACCCGACACAGACACCATCAACTGCGACCAGTTCAGCAGGCTGTTGTGTGA  
 CATGGAAGGTGATGAAGAGACCAGGGAGGCTTATGCCAATATCGCGGAACTGGAC  
 CAGTATGTCTTCCAGGACTCCAGCTGGAGGGCCTGAGCAAGGACATTTTCAGTG  
TATGTGATTTTAAGGGTAGTCTTCAACGTCAAGAGAAGAGACCACCAAACAGGCTT  
TGTGATAAGAAAAGTACTTCACCTTCAAATTCAGACACAGAAATGAAATCTGAACAA  
 CTGCCTCCTTGTGTGAACCCTGGCAATCCTGTGTTTTTCATGTATGTTGGATCCAAA  
 GACTCCAGACAGCCACCTCACTATCAAACCTCAAATGATTATGTATAAAACCAA  
 TTCAAGTCATTATGGTGAATTTCTACCTATTCCACAGTTTTTCCCCTGCAATTATACT  
 CAAAGGAGCAAGTATTTTCAAGCCATATCAGAGCAACTGGATTTTATCAAAAATAAC  
 ACTCTAAATACTGCACCTGACAGAACCAGAACTCTTGATTTTCTAATATTCAACAC  
 ACTCTAT**G**AAAATATATTCCTTTGTATATTGAAGAGAAAATATACTCGGGAAAAATG  
 AGTGTTAAATCTAAGGGTAGAATACCTAATAAAGAAGATAAAAAGTTTTGAATCAAT  
 TTTTAAAATAAGTTAAATAAAGTATTTCAACTGATAAAAAAAAAAAAAAAAAAAAA

**Putative translation (255 residues):**

MRCLAPRPAGSYLSEPPQGSSQCATMELGPLEGGYLELLNS  
 DADPLCLYHFYDQMDLAGEEEIELYSEPDTDTINCDQFSRL  
 CDMEGDEETREAYANIAELDQYVFQDSQLEGLSKDIFSVCD  
 FKGS LQRQEKRP NRLCDKKSTSPSNSDTEMKSEQLPPCV  
 NPGNPVFSCMLDPKTLQTATSLSKPQMIMYKTNSSHYGEFL  
 PIPQFFPCNYTPKEQVFSSHIRATGFYQNNLNTAPDRRTL  
 DFPNIQHTL Stop

**2) Full length *CIITA-CD274* cDNA in a PMBCL case and putative translation (used for forced expression in U2940).** Translational start and stop codons in bold.

GGTTAGTGATGAGGCTAGTGATGAGGCTGTGTGCTTCTGAGCTGGGCATCCGAAG  
GCATCCTTGGGGAAGCTGAGGGCACGAGGAGGGGCTGCCAGACTCCGGGAGCT  
GCTGCCTGGCTGGGATTCTACACA**ATG**CGTTGCCTGGCTCCACGCCCTGCTGGG  
TCCTACCTGTCAGAGCCCCAAGGGCATTCCAGAAAGATGAGGATATTTGCTGTCTT  
TATATTCATGACCTACTGGCATTGCTGAACGCATTTACTGTCACGGTTCCCAAGGA  
CCTATATGTGGTAGAGTATGGTAGCAATATGACAATTGAATGCAAATCCCAGTAG  
AAAAACAATTAGACCTGGCTGCACTAATTGTCTATTGGGAAATGGAGGATAAGAAC  
ATTATTCAATTTGTGCATGGAGAGGAAGACCTGAAGGTTTCAGCATAGTAGCTACAG  
ACAGAGGGCCCGGCTGTTGAAGGACCAGCTCTCCCTGGGAAATGCTGCACTTCAG  
ATCACAGATGTGAAATTGCAGGATGCAGGGGTGTACCGCTGCATGATCAGCTATG  
GTGGTGCCGACTACAAGCGAATTACTGTGAAAGTCAATGCCCCATACAACAAAATC  
AACCAAGAATTTTGGTTGTGGATCCAGTCACCTCTGAACATGAACTGACATGTCA  
GGCTGAGGGCTACCCCAAGGCCGAAGTCATCTGGACAAGCAGTGACCATCAAGTC  
CTGAGTGGTAAGACCACCACCACCAATTCCAAGAGAGAGGAGAAGCTTTTCAATGT  
GACCAGCACACTGAGAATCAACACAACAATAATGAGATTTTCTACTGCACTTTTAG  
GAGATTAGATCCTGAGGAAAACCATACAGCTGAATTGGTCATCCCAGAACTACCTC  
TGGCACATCCTCCAAATGAAAGGACTCACTTGGTAATTCTGGGAGCCATCTTATTA  
TGCCTTGGTGTAGCACTGACATTCATCTTCCGTTTAAGAAAAGGGAGAATGATGGA  
TGTGAAAAAATGTGGCATCCAAGATACAAACTCAAAGAAGCAAAGTGATACACATTT  
GGAGGAGACG**TAA**TCCAGCATTGGAAGTTCTGATCTTCAAGCAGGGATTCTCAAC  
CTGTGGTTTAGGGGTTTCATCGGGGCTGAGCGTGACAAGAGGAAGGAATGGGCCC  
GTGGGATGCAGGCAATGTGGGACTTAAAAGGCCCAAGCACTGAAAATGGAACCTG  
GCGAAAGCAGAGGAGGAGAATGAAGAAAGATGGAGTCAAACAGGGAGCCTGGAG  
GGAGACCTTGATACTTTCAAATGCCTGAGGGGCTCATCGACGCCTGTGACAGGGA  
GAAAGGATACTTCTGAACAAGGAGCCTCCAAGCAAATCATCCATTGCTCATCCTAG  
GAAGACGGGTTGAGAATCCCTAATTTGAGGGTCAGTTCCTGCAGAAGTGCCCTTT  
GCCTCCACTCAATGCCTCAATTTGTTTTCTGCATGACTGAGAGTCTCAGTGTTGGA  
ACGGGACAGTATTTATGTATGAGTTTTTCTATTTATTTTGAAGATATATTGTAGTAGATGTT  
ACAATTTTGTGCCAAACTAACTTGCTGCTTAATGATTTGCTCACATCTAGTAAA  
CATGGAGTATTTGTAAAAA

**Putative translation (312 residues):**

MRCLAPRPAGSYLSEPPQGHSRKMRIFAVFIFMTYWHLLNAF  
TVTVPKDLVVEYGSNMTIECKFPVEKQLDLAALIVYWEME  
DKNIIQFVHGEEDLKVQHSSYRQRARLLKDQLSLGNAALQIT  
DVKLQDAGVYRCMISYGGADYKRITVKVNAPYNKINQRILVV  
DPVTSEHELTCQAEGYPKAEVIWTSSDHQVLSGKTTTTNSK  
REEKLFNVTSTLRINTTTNEIFYCTFRRLDPEENHTAELVIPE

L P L A H P P N E R T H L V I L G A I L L C L G V A L T F I F R L R K G R M M D V K  
K C G I Q D T N S K K Q S D T H L E E T Stop

**3) Full length *CIITA-PDCD1LG2* cDNA in a PMBCL case and putative translation (used for forced expression in U2940). *CIITA* start codon mutation underlined. The putative translation starts at the *PDCD1LG2* start codon (bold).**

GGTTAGTGATGAGGCTAGTGATGAGGCTGTGTGCTTCTGAGCTGGGCATCCGAAG  
GCATCCTTGGGGAAGCTGAGGGCACGAGGAGGGGCTGCCAGACTCCGGGAGCT  
GCTGCCTGGCTGGGATTCCTACACACTGCGTTGCCTGGCTCCACGCCCTGCTGGG  
TCCTACTTGTGAGAACCCCAAGATCAAATACAGAAC**ATG**ATCTTCCTCCTGCTAATG  
TTGAGCCTGGAATTGCAGCTTCACCAGATAGCAGCTTTATTACAGTGACAGTCCC  
TAAGGAAGTGTACATAATAGAGCATGGCAGCAATGTGACCCTGGAATGCAACTTTG  
ACACTGGAAGTCATGTGAACCTTGGAGCAATAACAGCCAGTTTGCAAAGGTGGAA  
AATGATACATCCCCACACCGTGAAAGAGCCACTTTGCTGGAGGAGCAGCTGCCCC  
TAGGGAAGGCCTCGTTCCACATACCTCAAGTCCAAGTGAGGGACGAAGGGCAGTA  
CCAATGCATAATCATCTATGGGGTGCCTGGGACTACAAGTACCTGACTCTGAAAG  
TCAAAGCTTCCTACAGGAAAATAAACACTCACATCCTAAAGGTTCCAGAAACAGAT  
GAGGTAGAGCTCACCTGCCAGGCTACAGGTTATCCTCTGGCAGAAGTATCCTGGC  
CAAACGTCAGCGTTCCTGCCAACACCAGCCACTCCAGGACCCCTGAAGGCCTCTA  
CCAGGTCACCAGTGTCTGCGCCTAAAGCCACCCCTGGCAGAACTTCAGCTGT  
GTGTTCTGGAATACTCACGTGAGGGAACCTTACTTTGGCCAGCATTGACCTTCAAAG  
TCAGATGGAACCCAGGACCCATCCAACCTTGGCTGCTTCACATTTTCATCCCCTCCT  
GCATCATTGCTTTTCATTTTCATAGCCACAGTGATAGCCCTAAGAAAACAACCTCTGTC  
AAAAGCTGTATTCTTCAAAGACACAACAAAAGACCTGTCACCACAACAAAGAGG  
GAAGTGAACAGTGCTATC**TGA**ACCTGTGGTCTTGGGAGCCAGGGTGACCTGATAT  
GACATCTAAGAAGCTTCTGGACTCTGAACAAGAATTCGGTGGCCTGCAGAGCTTG  
CCATTTGCACTTTTCAAATGCCTTTGGATGACCCAGCACTTTAATCTGAAACCTGCA  
ACAAGACTAGCCAACACCTGGCCATGAACTTGCCCTTCACTGATCTGGACTCAC  
CTCTGGAGCCTATGGCTTTAAGCAAGCACTACTGCACCTTACAGAATTACCCCACT  
GGATCCTGGACCCACAGAATTCCTTCAGGATCCTTCTTGCTGCCAGACTGAAAGCA  
AAAGGAATTATTTCCCCTCAAGTTTTCTAAGTGATTTCCAAAAGCAGAGGTGTGTGG  
AAATTTCCAGTAACAGAAACAGATGGGTTGCCAATAGAGTTATTTTTTATCTATAGC  
TTCCTCTGGGTACTAGAAGAGGCTATTGAGACTATGAGCTCACAGACAGGGCTTC  
GCACAACTCAAATCATAATTGACATGTTTTATGGATTACTGGAATCTTGATAGCAT  
AATGAAGTTGTTCTAATTAACAGAGAGCATTAAATATACTAAGTGACAAATTG  
TGGAGTAAAGTCATCAAGCTCTGTTTTTGAGGTCTAAGTCACAAAGCATTGTGTTTA  
ACCTGTAATGGCACCATGTTTAATGGTGGTTTTTTTTTTGAACTACATCTTTCCTTTA  
AAAATTATTGGTTTCTTTTTATTTGTTTTTACCTTAGAAATCAATTATATACAGTCAA  
AATATTTGATATGCTCATAACGTTGTATCTGCAGCAATTTAGATAAGTAGCTAAAAT  
GGCCAAAGCCCCAACTAAGCCTCCTTTTCTGGCCCTCAATATGACTTTAAATTTGA  
CTTTTCAGTGCCTCAGTTTGCACATCTGTAATACAGCAATGCTAAGTAGTCAAGGC  
CTTTGATAATTGGCACTATGGAAATCCTGCAAGATCCCACTACATATGTGTGGAGC



AGAAGGGTAACTCGGCTACAGTAACAGCTTAATTTTGTTAAATTTGTTCTTTATACT  
GGAGCCATGAAGCTCAGAGCATTAGCTGACCCTTGA ACTATTCAAATGGGCACATT  
AGCTAGTATAACAGACTTACATAGGTGGGCCTAAAGCAAGCTCCTTAACTGAGCAA  
AATTTGGGGCTTATGAGAATGAAAGGGTGTGAAATTGACTAACAGACAAATCATACT  
ATCTCAGTTTCTCAATTCTCATGTAATCAGAGAATGCCTTTAAAGAATAAAACTCAA  
TTGTTATTCTTCAACGTTCTTTATATATTCTACTTTTGGGTAAAAAAAAAAAAAAAA

**Putative translation (295 residues):**

MIFLLLMLSLELQLHQIAALFTVTVPKELYIIEHGSNVTLECN  
FDTGSHVNLGAITASLQKVENDTSPHRERATLLEEQLPLGK  
ASFHIPQVQVRDEGQYQCIIIYGVAWDYKYLTLKVKASYRKI  
NTHILKVPETDEVELTCQATGYPLAEVSWPNVSV PANTSHS  
RTPEGLYQVTSVLRLKPPPGRNFSCVFWNTHVRELTLASID  
LQSQMEPRTHPTWLLHIFIPSCIIAFIFIATVIALRKQLCQKLY  
SSKDTTKRPVTTTKREVNSA I Stop

**4) Full length *CIITA-RALGDS* cDNA in a PMBCL case and putative translation.**

GGTTAGTGATGAGGCTAGTGATGAGGCTGTGTGCTTCTGAGCTGGGCATCCGAAG  
GCATCCTTGGGGAAGCTGAGGGCACGAGGAGGGGCTGCCAGACTCCGGGAGCT  
GCTGCCTGGCTGGGATTCTACACA**ATG**CGTTGCCTGGCTCCACGCCCTGCTGGG  
TCCTACCTGTCAGAGCCCCAAGAGCTCCACGCAGGAGATCGGT**G**AGGAGCTGATC  
AACGGAGTCATCTACTCCATCTCCCTGCGCAAGGTGCAGCTGCACCACGGAGGCA  
ACAAGGGGCAGCGCTGGCTCGGGTATGAGAATGAGTCGGCCCTGAACCTTTATGA  
GACTTGCAAGGTGCGGACCGTGAAGGCTGGCACGCTGGAGAAGCTGGTGGAGCA  
CCTGGTGCCAGCCTTCCAGGGCAGCGACCTCTCCTACGTACCATCTTCCCTGTGT  
ACCTATAGAGCCTTACCACCACCCAACAGGTCCTGGACCTGCTGTTCAAAGGTA  
CGGTAGATGTGACGCCCTCACGGCCTCCTCTAGATACGGCTGCATCCTCCCCTAT  
TCCGACGAGGATGGTGGACCCCAGGACCAACTTAAAAATGCCATCTCCTCCATCC  
TGGGCACCTGGCTGGACCAGTACTCGGAGGATTTCTGTCAACCTCCGGACTTTCC  
CTGCCTCAAGCAGCTGGTGGCCTACGTGCAGCTCAACATGCCAGGCTCAGACCTG  
GAGCGCCGTGCCACCTTCTCCTGGCCAGCTGGAGCACTCGGAACCCATTGAG  
GCAGAGCCTGAGGCTCTGTCAACAGTGCCAGCTCTAAAACCAACTCCAGAGCTCG  
AGCTAGCTCTAACACCAGCTCGAGCACCCAGCCAGTGCCGGCTCCAGCCCCGG  
AGCCAGAGCCAGCTCCAACACCAGCTCCAGGTTAGAGCTAGAAGTAGCTCCAGC  
ACCAGCTCCGGAGCTCCAGCAGGCTCCAGAGCCAGCTGTGGGACTAGAATCGGC  
TCCAGCGCCAGCTCTGGAAGTACAGCCAGCTCCAGAACAGGATCCAGCTCCCTCA  
CAAAGTCTAGAGCTGGAGCCAGCTCCAGCACCAAGTTCCATCATTACAGCCTTCTG  
GCCTTACCTGTGGTTGCAGAGAACGGGCTGAGTGAGGAGAAGCCTCACCTCTTG  
GTGTTCCCTCCAGATCTGGTGGCAGAGCAGTTTAACTGATGGATGCGGAACTGTT  
CAAGAAGGTGGTGCCCTACCACTGCCTGGGCTCCATCTGGTCCCAGCGGGACAA  
GAAGGGCAAGGAGCACCTGGCGCCACCATCCGCGCCACTGTCACCCAGTTCAA  
CAGTGTGGCCAACTGTGTCATCACCACTGCCTCGGGAACCGAAGCACGAAAGCC  
CCAGACAGGGCCAGGGTGGTGGAGCACTGGATCGAGGTGGCCAGGGAGTGCCG  
GATCCTCAAGAAGTCTCGTCACTGTATGCCATCCTCTCTGCCCTGCAGAGCAACT  
CCATCCACCGTCTGAAGAAGACGTGGGAAGACGTTTCCAGGGACAGTTTCCGGAT  
CTTTCAGAAGCTGTGAGAGATCTTCTCAGATGAGAACAAGTACTCATTGAGCCGGG  
AGCTGCTCATCAAGGAGGGCACCTCCAAGTTTGCCACCCTGGAGATGAACCCCAA  
GAGAGCCCAGAAACGGCCGAAGGAGACGGGCATCATCCAGGGCACCGTTCCCTA  
CCTGGGCACGTTCCCTACCGACCTGGTGTGCTGGACACTGCCATGAAGGACTAT  
CTGTATGGCAGACTCATCAACTTTGAGAAGAGGAGGAAGGAGTTCGAGGTGATCG  
CCCAGATCAAGCTGCTGCAGTCGGCCTGCAACAAGTACAGCATCGCGCCAGATGA  
GCAATTTGGGGCCTGGTTCCGGGCCGTGGAGCGGCTCAGCGAGACTGAGAGCTA  
CAACCTGTGCTGCGAGCTGGAGCCCCATCCGAGTCAGCCAGCAACACCCTCAG  
GACCAAGAAGAACACAGCCATTGTCAAGCGCTGGAGCGACCGCCAGGCCCCAG  
CACTGAGCTCAGTACCAGTGGCAGCTCCCACTCCAAGTCCCTGTGACCAGCTCAGG  
TGTGGCCCTACCTCAGCAGCGGGGACATCGCTGACGCGCTCAGCGTCACTCG  
GCCGGCTCCTCTAGCTCCGACGTGGAGGAGATCAACATCAGCTTCGTCCCAGGAGT  
CTCCTGATGGCCAGGAAAAGAAGTTCTGGGAATCAGCCTCACAGTCATCCCCGGA  
GACCTCCGGCATCAGCTCAGCCTCCAGCAGCACCTCGTCCTCCTCAGCCTCCACC  
ACGCCCGTGGCTGCCACACGCACCCACAAGCGCTCTGTCTCAGGGCTCTGCAACT  
CCAGCTCCGCGCTGCCGCTTACAACCAGCAGGTGGGCGACTGCTGTATCATCCG

CGTCAGCCTGGACGTGGACAATGGCAACATGTACAAGAGCATCCTGGTGACCAGC  
CAAGATAAGGCTCCGGCTGTAATCCGCAAGGCCATGGACAAACACAACCTGGAGG  
AGGAGGAGCCGGAGGACTATGAGCTGCTGCAGATTCTCTCAGATGACCGGAAGCT  
GAAGATCCCTGAAAACGCCAACGTCTTCTATGCCATGAACTCTACCGCCAACCTATG  
ACTTTGTCCTCAAGAAGCGGACCTTCACCAAGGGAGTGAAGGTCAAGCACGGGAGC  
CAGCTCCACCCTCCCTCGCATGAAGCAGAAAGGACTCAAGATTGCCAAGGGCATC  
TTCTGAGGGGCATCCTCCCAGGGTCTGGCTGGCTGGTAGCCAAGCACTTATGGACC  
AGAGTGGCCCAGGCCAGCTGGGCGCCTTCCTCCCACCTGCCAGCCCAGGGTACC  
CCAGACTCCAGTTTCATCCTGAACCTCTCCCGCTGCTGGGATTGACGCCTGCCATT  
GGTCAGGCTGACCTGGCCTCCCGTGGACCACTCGCTGCCTTAGGTGCCTTCTGCT  
CTCTGGAACCAGAGGACTAGCTGACTTTTGCCAAGGAGCAGTGCCAACGGGCATG  
GCATGGTGCCCTGCCTGCCCCCGGGCGCCACCTCTGTACACTTCCCTGACACCTT  
CCCAGGTGTGGGTCACTGCCACCTGTGCCCATGGGCACCCCAGAGCACCCACTG  
TGACCACTGCAGTTCTCTCATGCCACAGGCACTGGCCTGTGACCTTCGCAGGGG  
TCCCGGCCCTCCCACTCTAGCCTTTCTCAGGCTGCACCAAAGATTCCATCAT  
CAGGGCCAACTGAGAGTGAGGGAGTCTCACCCACCGCTTACCCCAGCCCTCCCCT  
GGGAGCAGAGAGAGAAACCCTCTTCATGGACCAGACTCTGCACCCGGTGAGTGA  
GGACAGTCCCAGCTGAGTCCCATCGATGTTGAATCTCATGCCACTGCAAGTGCCA  
TTCACCACTGCGTCTGGGCTTTACGAGACCATGCAAGACGGGGGTTAGTGAGGA  
AGGAGGATTTGGGGTGGGGGTGGGGTGAATTGAATATTTGTATAAAAAGCAAAAAG  
AAAAAAAAAATGTTTGTACTGATTGGGGAGGGGCAATATTTATTTGTTGTAAATA  
GCAAATGCTAGACTTGAATATTATATTAATCCTGTTTCTACTATAAAAAAAAAAAAA  
AAAAAAAAAAAA

**Putative translation (24 residues):**

MRCLAPRPAGSYLSEPELHAGDR Stop

**5) Full length *CIITA-C16ORF75* cDNA in a PMBCL case and putative translation.**

GGTTAGTGATGAGGCTAGTGATGAGGCTGTGTGCTTCTGAGCTGGGCATCCGAAG  
GCATCCTTGGGGAAGCTGAGGGCACGAGGAGGGGCTGCCAGACTCCGGGAGCT  
GCTGCCTGGCTGGGATTCCTACACA**ATGCGTTGCCTGGCTCCACGCCCTGCTGGG**  
TCCTACCTGTCAGAGCCCCAAGGGTCTCGCTCTGCTGCCCAGGCTGGAGTGCAGT  
GGCGCCATCTCAGCTGCAACGTCTGCCTCCGAGTTCAAGCAGTCCTCCCGCTGGG  
ACTACAGGTGTGCAACACCACACCCAGCT**AA**TTTTGTTTATTTTTTTGTAGAGATAGG  
GTTTCATCATGTTGCCCAGGCTGGTCTCGAACTGCTGGGCTCCAACGATCCACCC  
ACCTCAGCCTCCCAAAGTGCTAGGATGACAAGTGTGAGTCACTGCACCCAGCCTG  
AATCATTTTTTAAAGAGCATGTGTCCATTAATAATTTTTAATGAAAAAAAAAAAAA  
AAAAAAAAAAAAA

**Putative translation (56 residues):**

MRCLAPRPAGSYLSEPPQGSRSAAQAGVQWRHLSCNVCLRV  
QAVLPLGLQVCNTTPS Stop

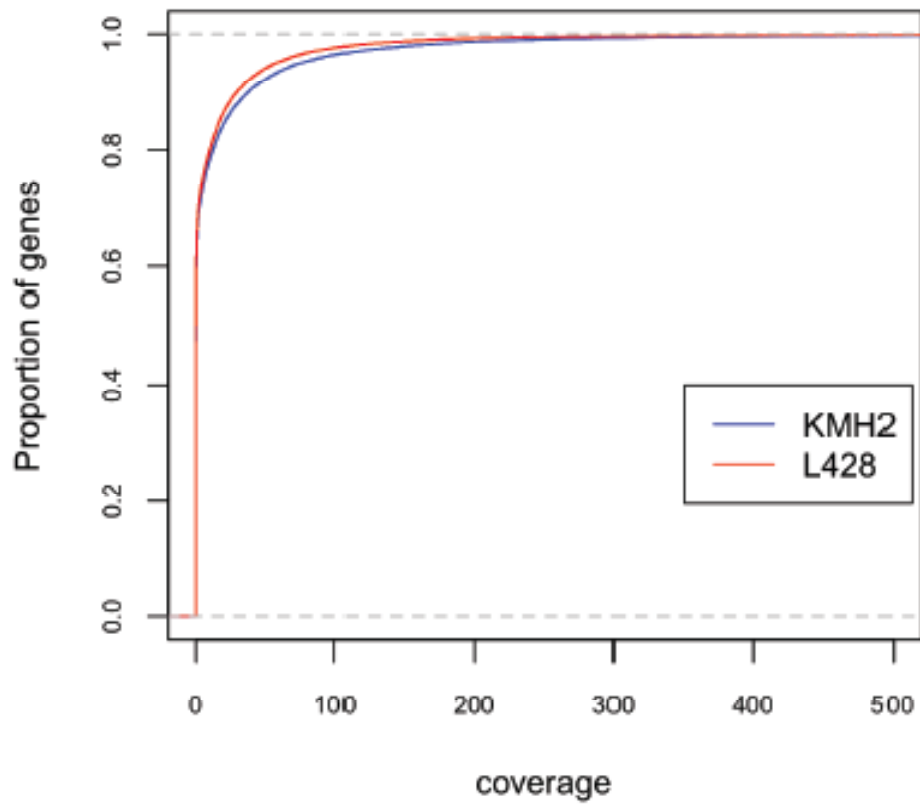

**Supplementary Figure S1:** Cumulative distribution plots of expression for both KM-H2 and L428 showing the proportion of genes expressed at increasing coverage levels.

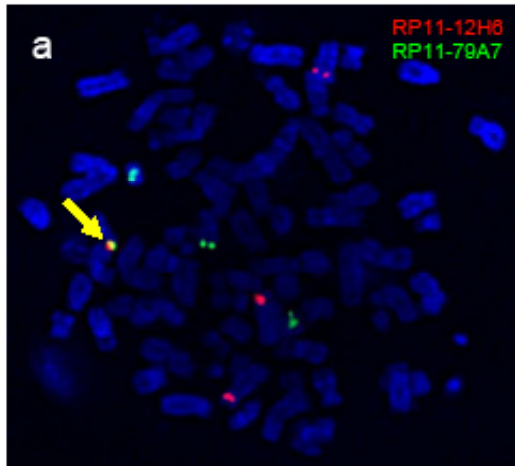

**c** Breakpoint sequence (ELMO1-SLCO3A1) in L428

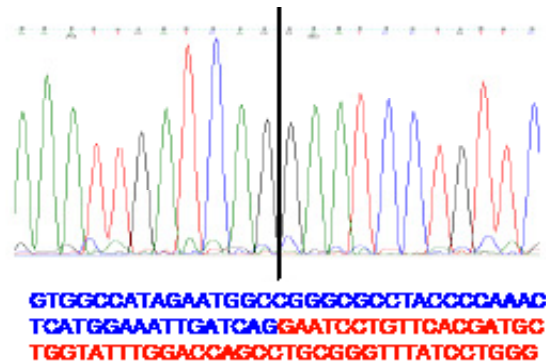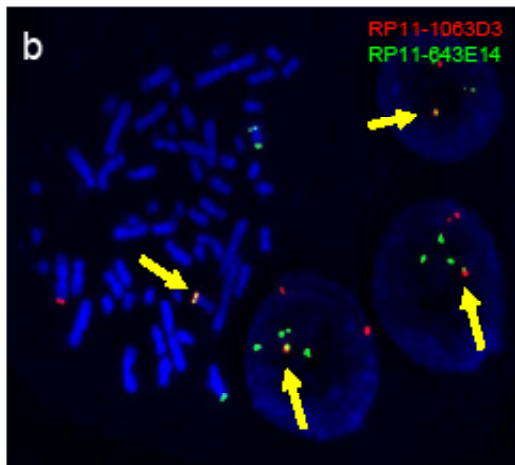

**d** Breakpoint sequence (BAT2L1-MGMT) in KM-H2

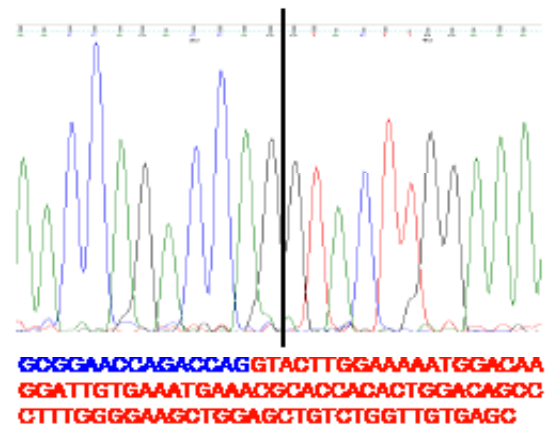

**Supplementary Figure S2:** Validation of fusion transcripts by FISH and direct sequencing. **a**, L428 metaphase cell with co-localization of the *SLCO3A1* (RP11-79A7) and *ELMO1* (RP11-12H6) gene loci (yellow arrow). **b**, Direct sequencing and breakpoint sequence of an *ELMO1-SLCO3A1* fusion transcript as predicted by RNAseq. **c**, KM-H2 interphase and metaphase cell with co-localization of the *BAT2L1* (RP11-643E14) and *MGMT* (RP11-1063D3) gene loci (yellow arrows). **d**, Direct sequencing and breakpoint sequence of a *BAT2L1-MGMT* fusion transcript as predicted by RNA-seq.

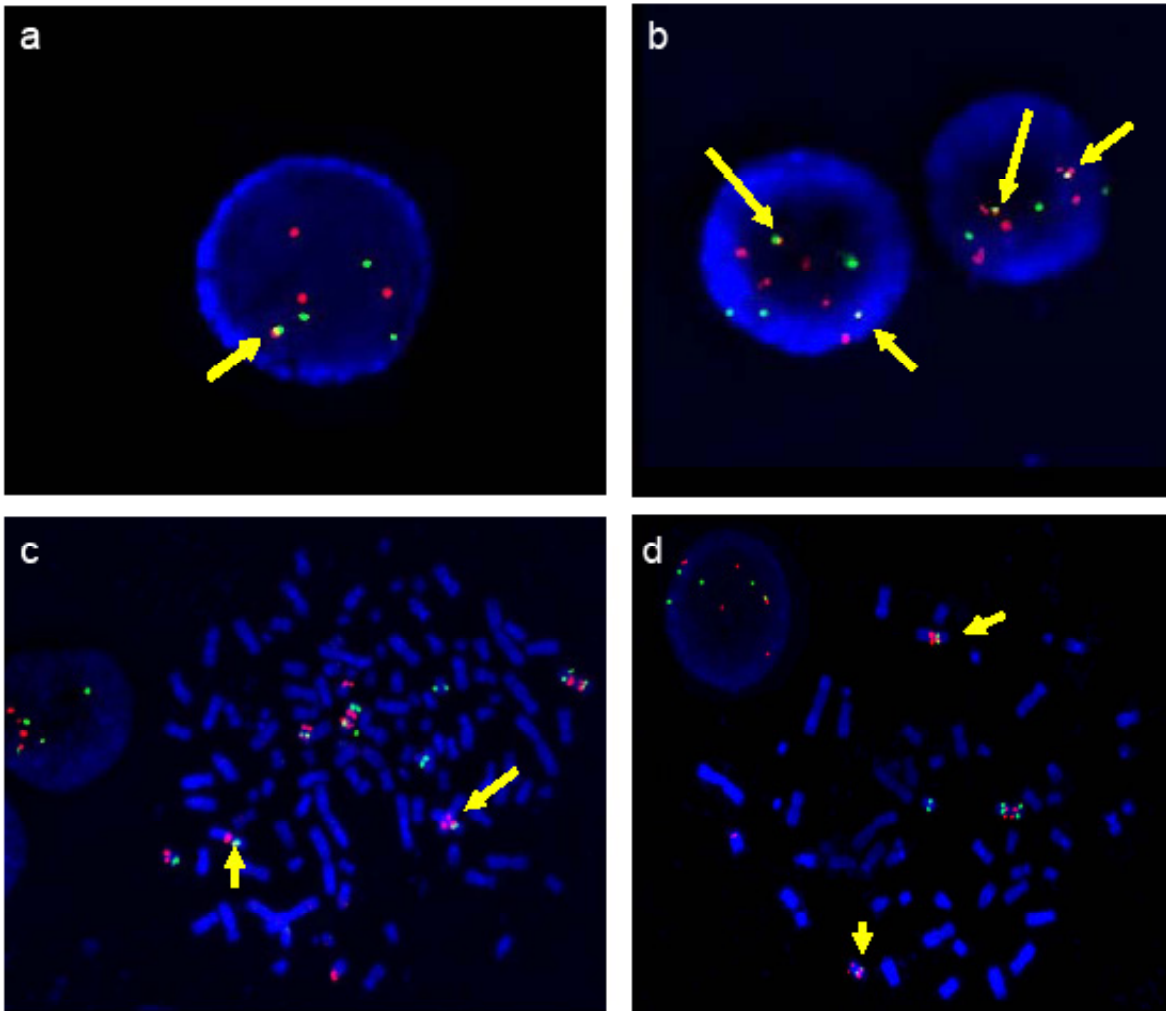

**Supplementary Figure S3:** Validation of complex chromosome 16 rearrangements in KM-H2 leading to expression of *CIITA*-*BX648577* fusion transcripts. Yellow arrows indicate co-localization of the gene loci of *CIITA* and *BX648577* in interphase (**a+b**) and metaphase (**c+d**) cells. Green signals: *BX648577* locus (15q21.3, RP11-460A24); Red signals: *CIITA* locus (16p13.13, RP11-1057F14).



**a** KM-H2 cells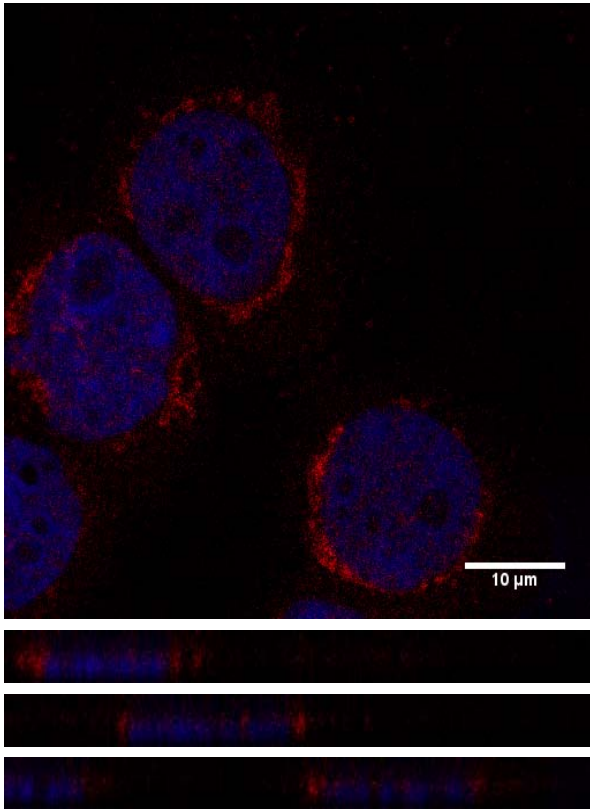**b** Primary B cells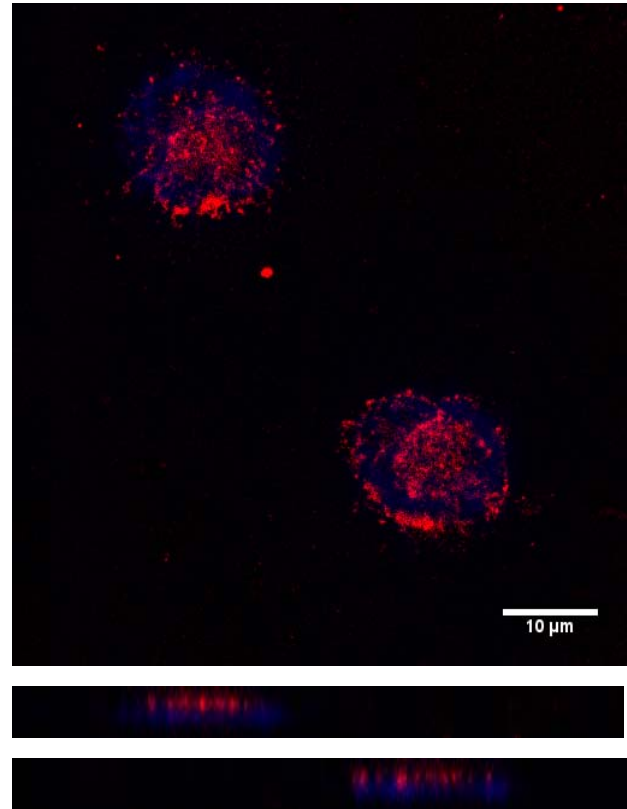

**Supplementary Figure S4:** Immuno-fluorescence staining with N-terminal CIITA antibody. **a**, Confocal microscopy shows a perinuclear staining pattern of the fusion protein in KM-H2 cells. **b**, The staining pattern in primary B cells is predominantly nuclear. The lower panels show slice views from the side which were derived from Z stack image series.

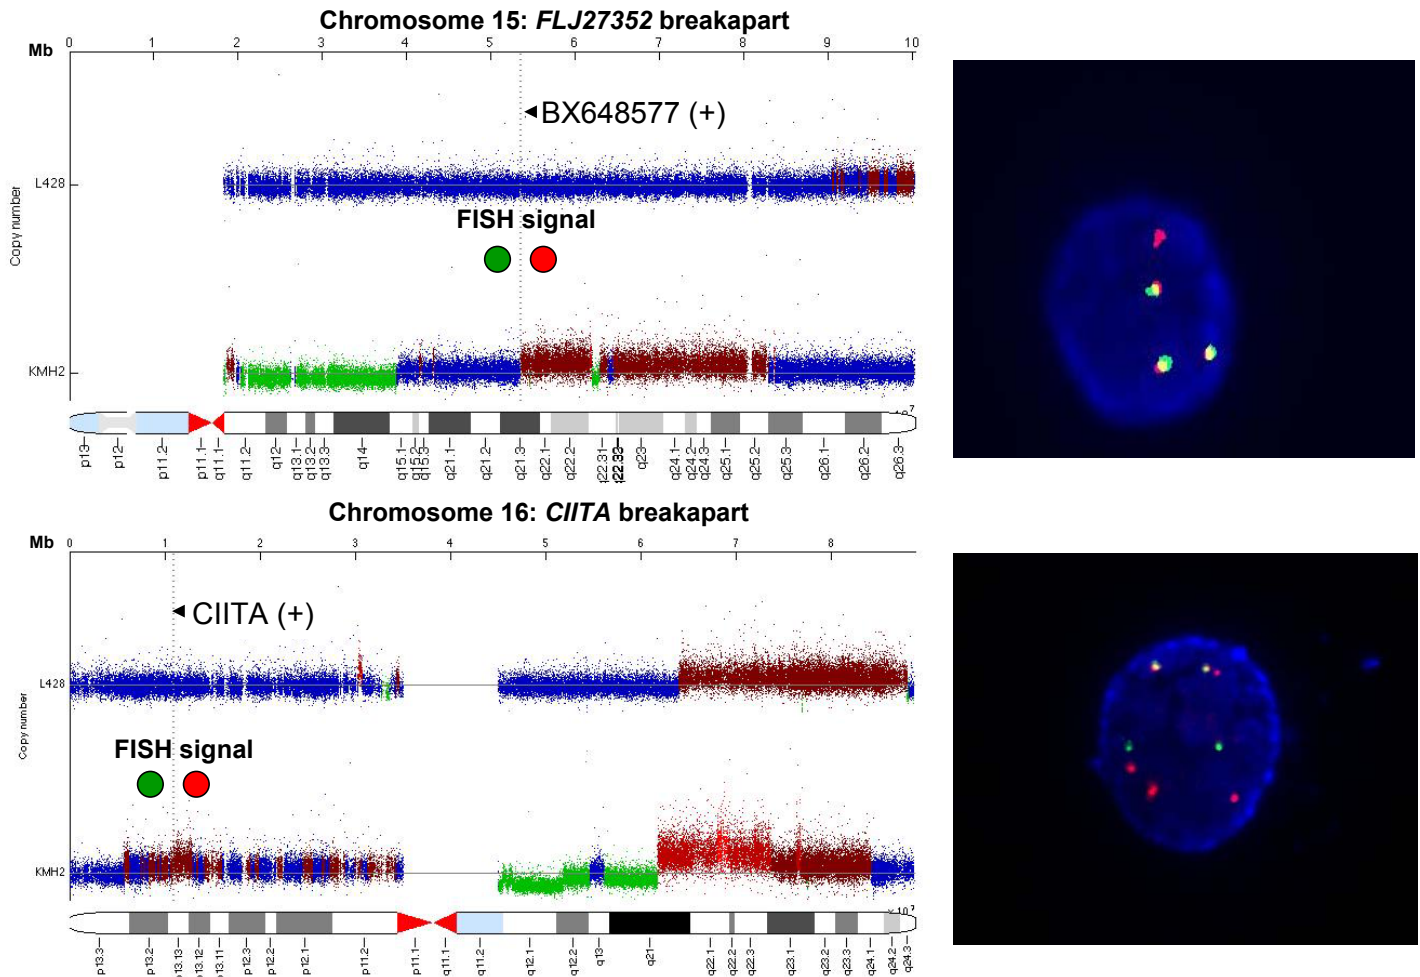

**Supplementary Figure S5:** High-resolution single nucleotide polymorphism analysis and FISH confirm chromosomal unbalances accompanying complex rearrangements involving chromosomes 15 and 16 in KM-H2. Results of high-resolution genotyping arrays and FISH using *CIITA* (RP11-109M19, RP11-66H6) and *BX648577* (RP11-139H15, RP11-161E4) break-apart probes are shown. Copy number changes are color-coded according to five discrete copy number states: green=loss; blue=neutral; dark red=gain; medium red=amplification; bright red=high level amplification. Predicted breakpoints in *CIITA* and *BX648577* by RNA-seq are indicated by the hatched lines.

**Upper panel:** Relative amplification of chromosomal material telomeric of the *BX648577* breakpoint in KM-H2 is confirmed by FISH (4 fused + 1 red signal). **Lower panel:** Relative amplification of chromosomal material centromeric of the *CIITA* breakpoint in KM-H2 is confirmed by FISH (2 fused + 2 green + 3 red signals). L428 is shown as reference.

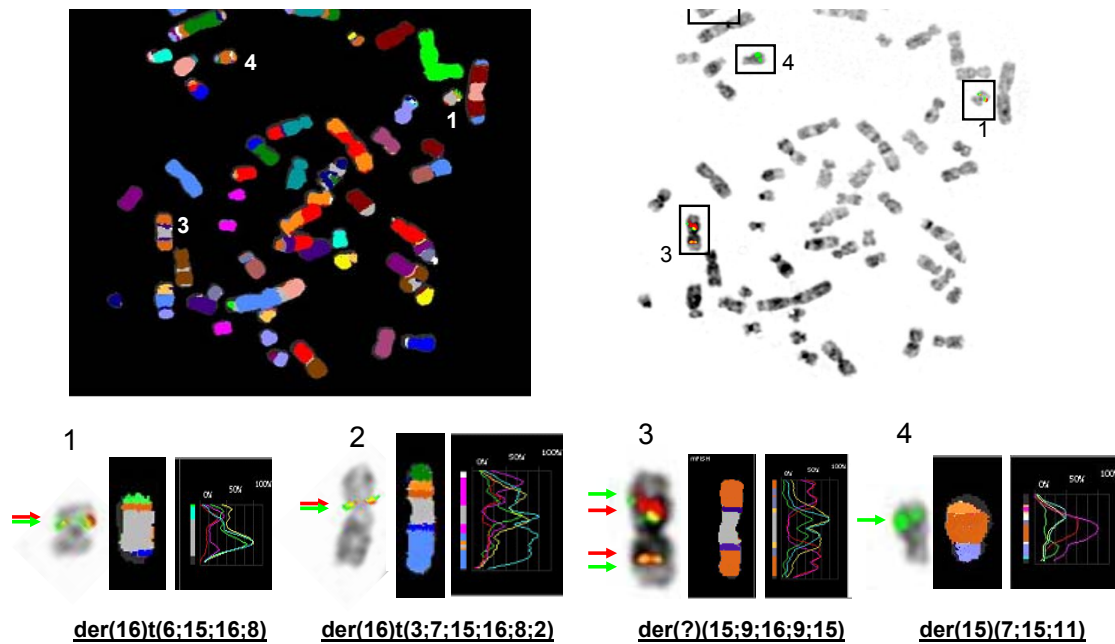

**Supplementary Figure S6:** Detailed molecular-cytogenetic characterization of KM-H2.

**a**, 24-colour FISH of a representative KM-H2 metaphase matching the same metaphase in **b**, stained with locus-specific FISH probes for the *CIITA* (WI2-1388I10) and *BX648577* (WI2-2329H16) gene loci (Fosmid probes). The Banding pattern is shown in inverted DAPI. The four derivative chromosomes with involvement of the *CIITA* and *BX648577* loci are shown in higher magnification (1-4). As part of complex rearrangements between chromosomes 15 and 16, chromosomal material telomeric of the *CIITA* breakpoint is fused with chromosomal material telomeric of the *BX648577* breakpoint on two derivative chromosomes 16 (1+2). Note that the derivative chromosome *der*(?)(15;9;16;9;15) (3) does not harbour *CIITA*-*BX648577* gene fusions as FISH showed no break-apart signals for the *CIITA* and *BX648577* gene loci on this derivative chromosome (data not shown).

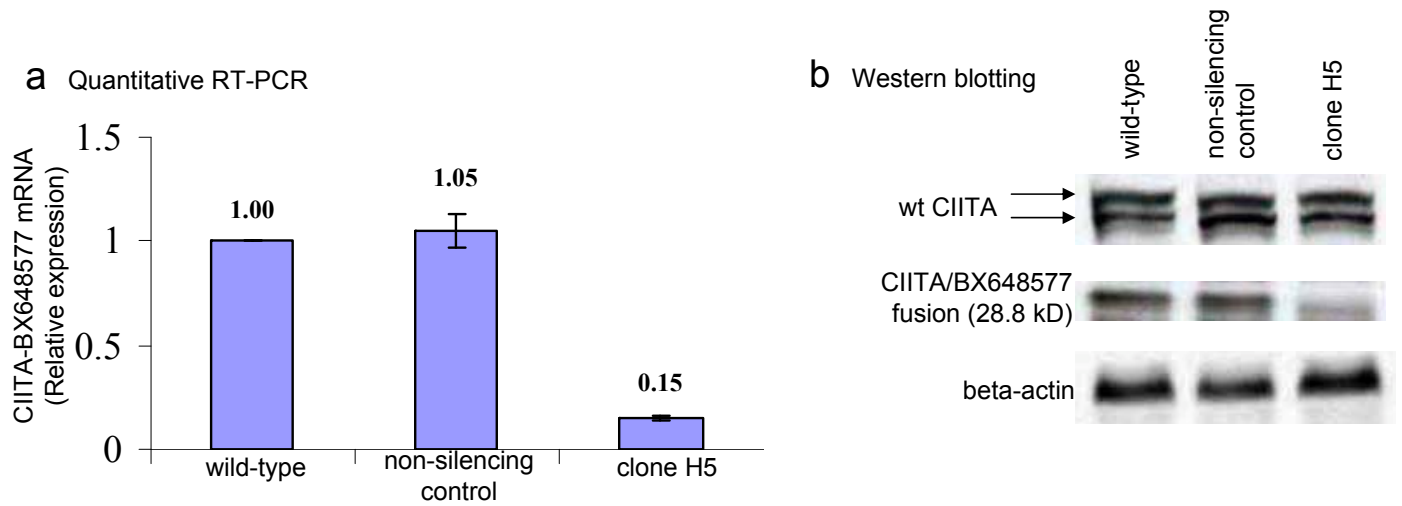

**pplementary Figure S7:** Inhibition of CIITA/BX648577 fusion gene expression by a viral shRNAmir vector. KM-H2 cells stably transduced by either an shRNAmir (clone H5), or a non-silencing control were examined for mRNA and protein expression of the CIITA/BX648577 fusion by **a**, qRT-PCR and **b**, Western blotting

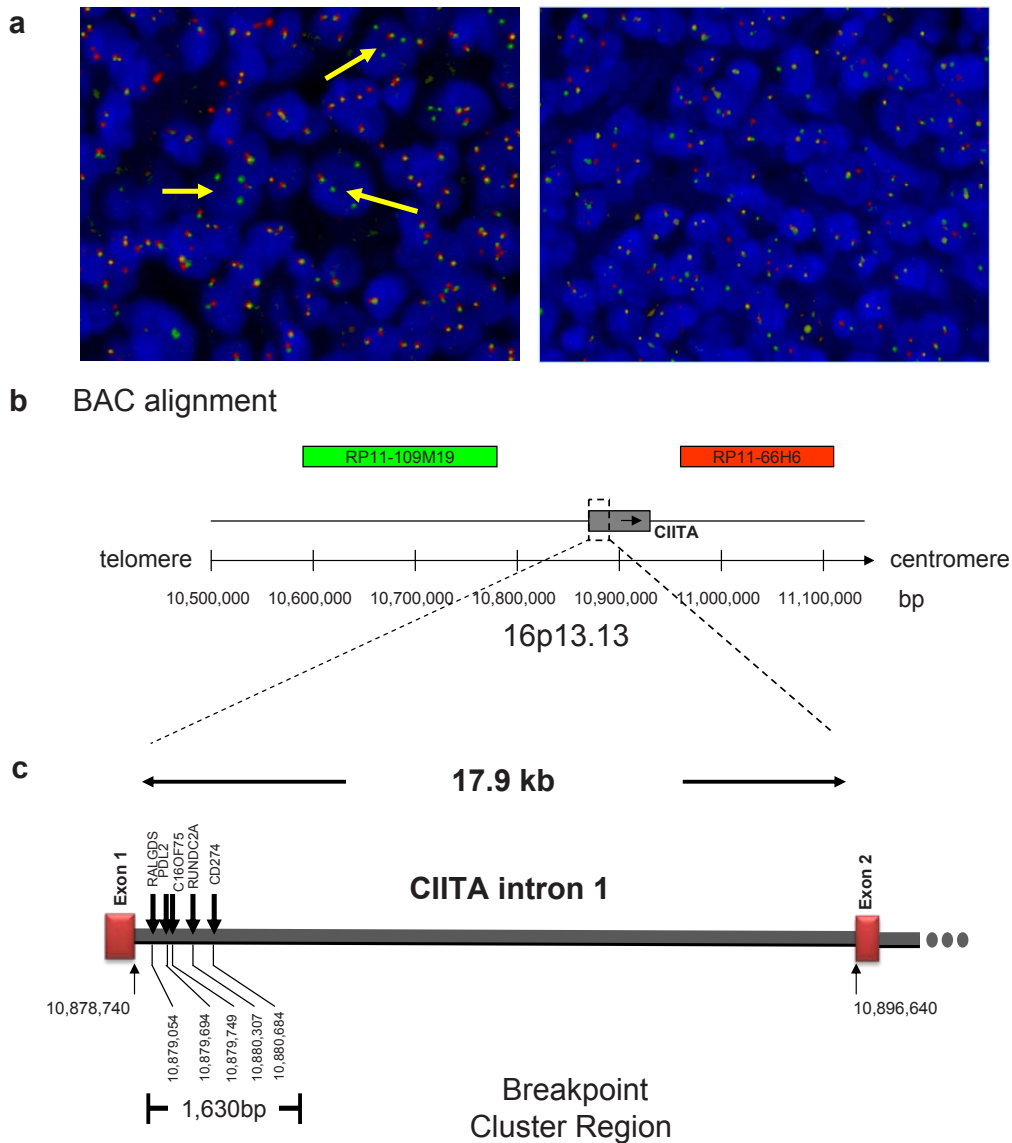

**Supplementary Figure S8:** Genomic breakpoints in the *CIITA* gene defining a 1,630bp breakpoint cluster region in intron1 based on 5 cases with *CIITA* rearrangements. **a**, Left panel: cHL case with unbalanced *CIITA* rearrangement in aberrant large HRS (yellow arrows) cells displaying 1 fusion signal and 3 green signals (telomere side of the breakpoint) Right panel: PMBCL case with rearrangement of one allele while the other *CIITA* allele seems intact (1 fused + 1 red + 1 green signal). **b**, BAC alignment for *CIITA* break-apart assay. Hatched box indicates location of *CIITA* intron 1 containing **c**, breakpoint cluster region defined by genomic breakpoints found in 5 PMBCL cases.

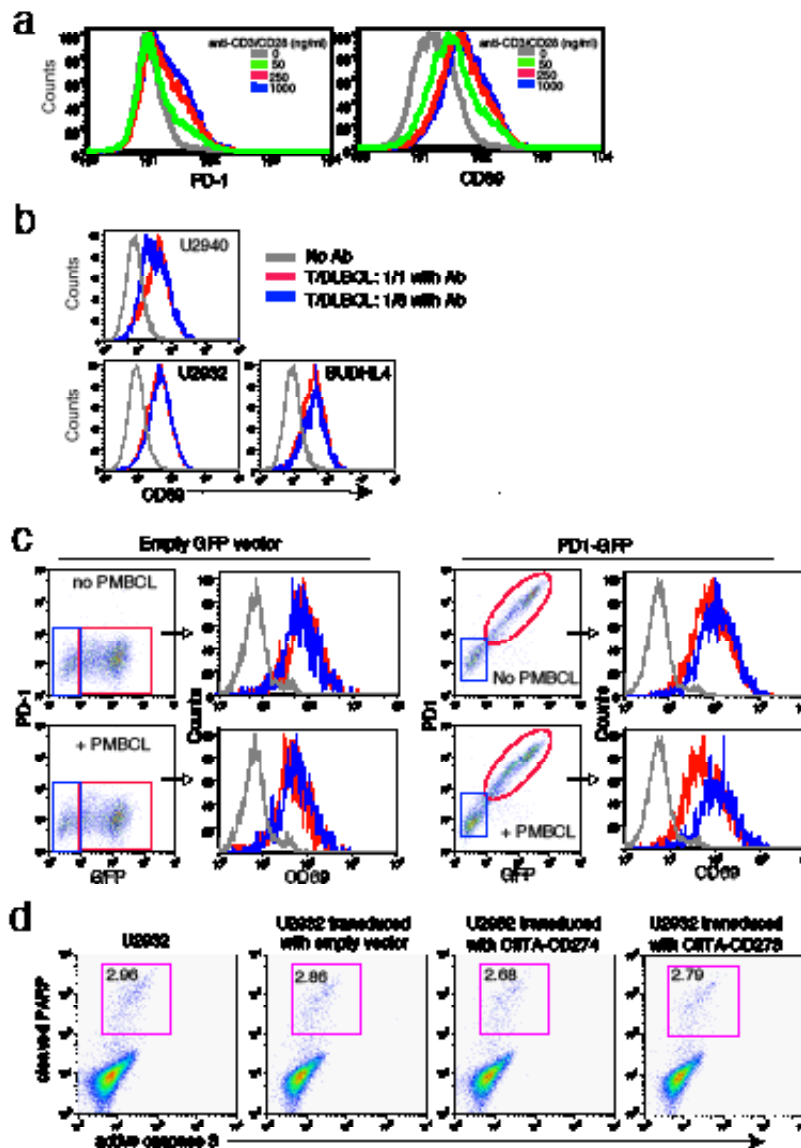

**Supplementary Figure S9:** a, Induction of PD-1 and CD69 by anti-CD3 and anti-CD28 antibodies in Jurkat T cells. b, Inhibition of T cell activation by PMBCL (U2940) cells but not by ABC (U2932) or GCB (SUDHL4) DLBCL cells. c, Forced PD1 expression on Jurkat T cells augments T cell inhibition by PMBCL cells. Jurkat T cells transduced with bicistronic PD1-GFP vector (right panel) or empty GFP vector (left panel) in mono-culture (upper panel) and in co-culture mixed with U2940 cells (ratio 1:4) (bottom panel) were stimulated with anti-CD3 and anti-CD28 for 4 h before harvesting. Shown are FACS plots of Jurkat T cells (CD-2 positive). Dot plots display the expression levels of PD1 vs GFP. Histograms show the expression levels of CD69 in GFP positive cells (red histograms) vs GFP negative cells (blue histograms, internal controls). Non-stimulated

Jurkat cells served as negative controls (gray histograms). **d**, Flow cytometric analysis of intracellular cleaved PARP and active caspase 3 do not show differences between transduced and wildtype U2932 cells.

### Supplementary Figure S10a: Probe design for FISH-validation of *CIITA*-*BX648577* fusion in KM-H2

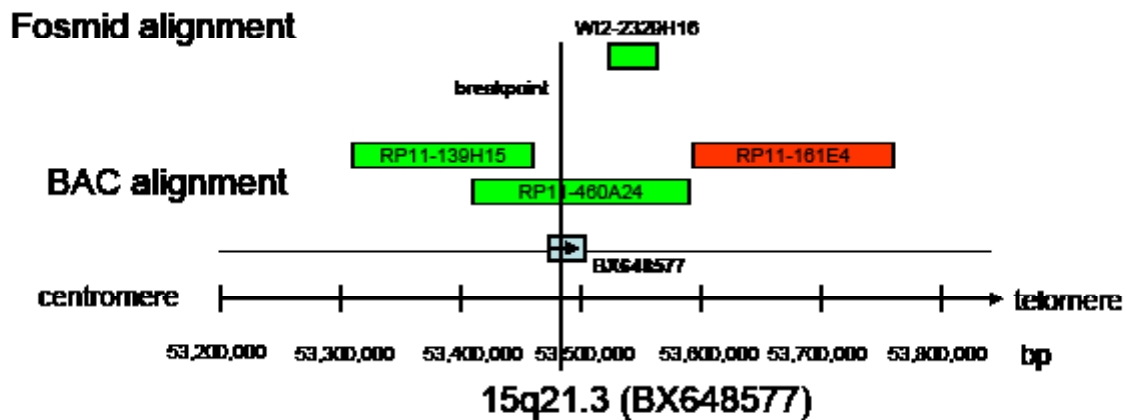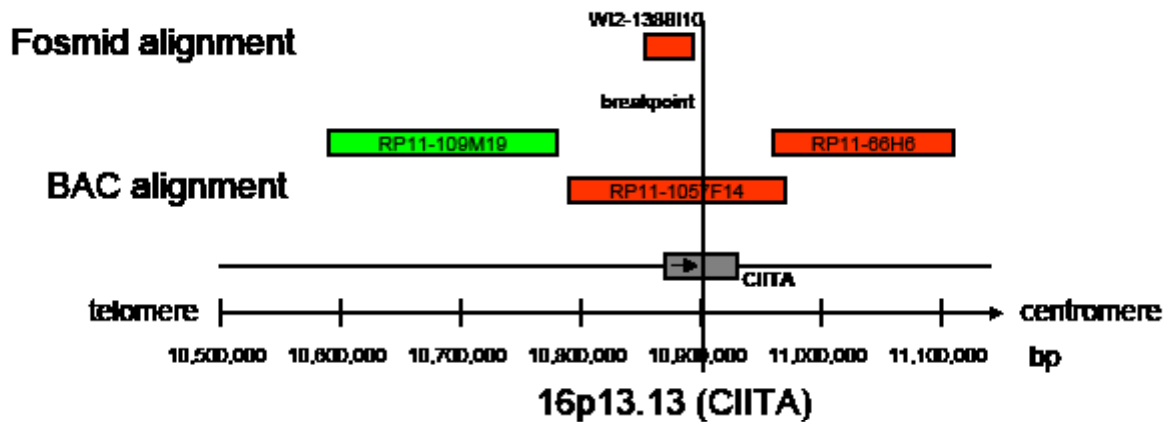



**Supplementary Figure S10b: Probe design for FISH-validation of *BAT2L1-MGMT* fusion in KM-H2**

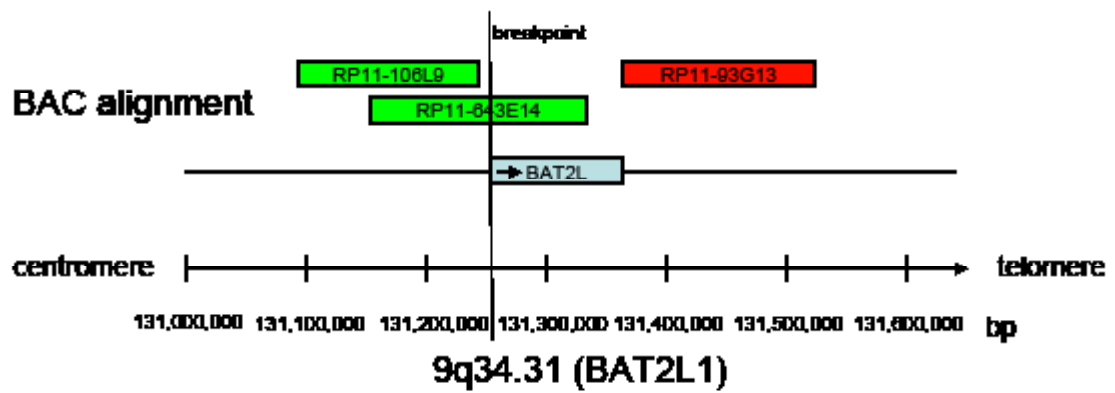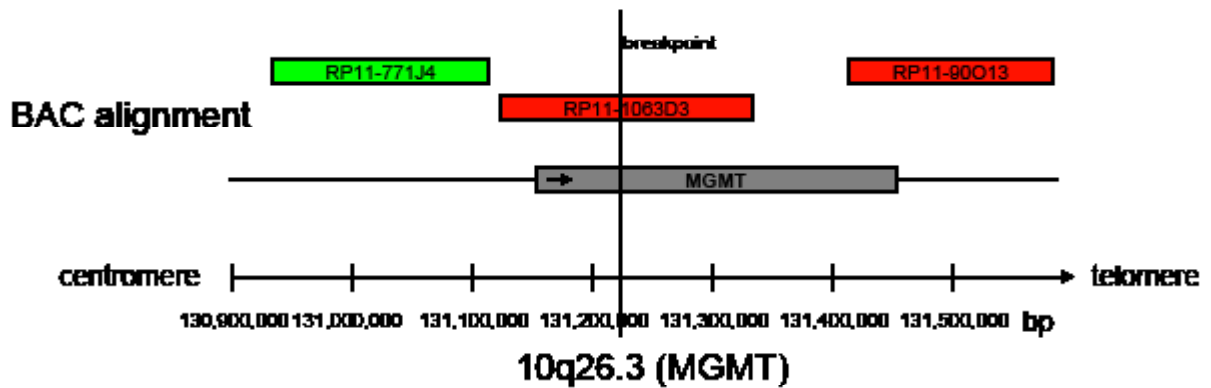

**Supplementary figure S10c:** Probe design for FISH-validation, *ELMO1-SLCO3A1* fusion in L428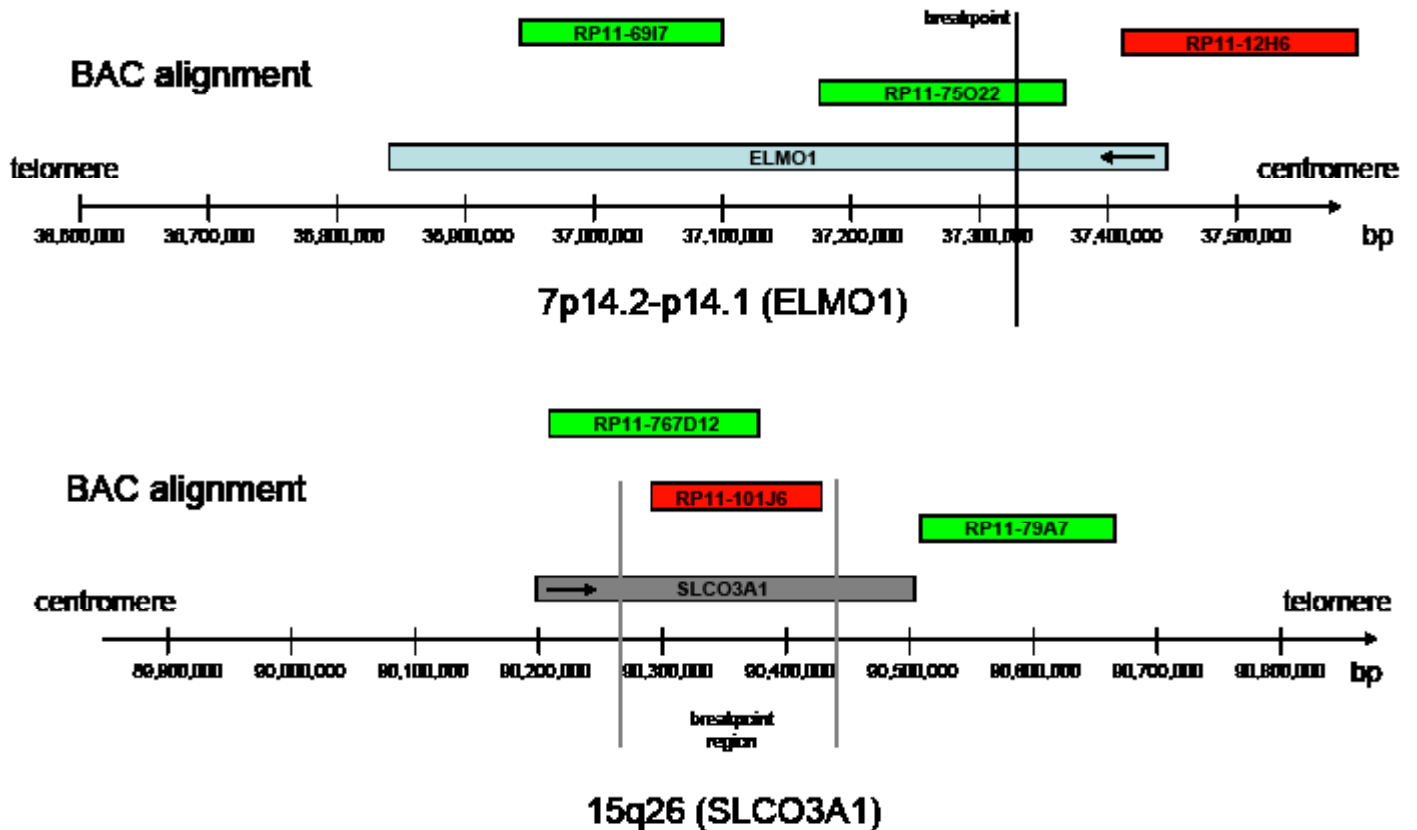

**Supplementary Figure S10:** Probe design for FISH-validation experiments. **a**, BAC and Fosmid alignments for *CIITA-BX648577* fusion and break-apart assays. Red: probes labeled in SpO Green: probes labeled in SpG. **b**, BAC alignments for *BAT2L1-MGMT* fusion and break-apart assays. **c**, BAC alignments for *ELMO1-SLCO3A1* fusion and break-apart assays.
